# Supplementary material
Source: publisher figshare collection journal article supplement (https://geolsoc.figshare.com/articles/dataset/_/3453695)
Supplement: Supplementary file 1 [file 1]

# NE Greenland age determinations: Plateau and isochron plots for 19 samples

## Sample 194233, Lower Plateau Lava Series, Lille Pendulum

09C393.AGE >>> 194233 >>> LARSEN PROJECT

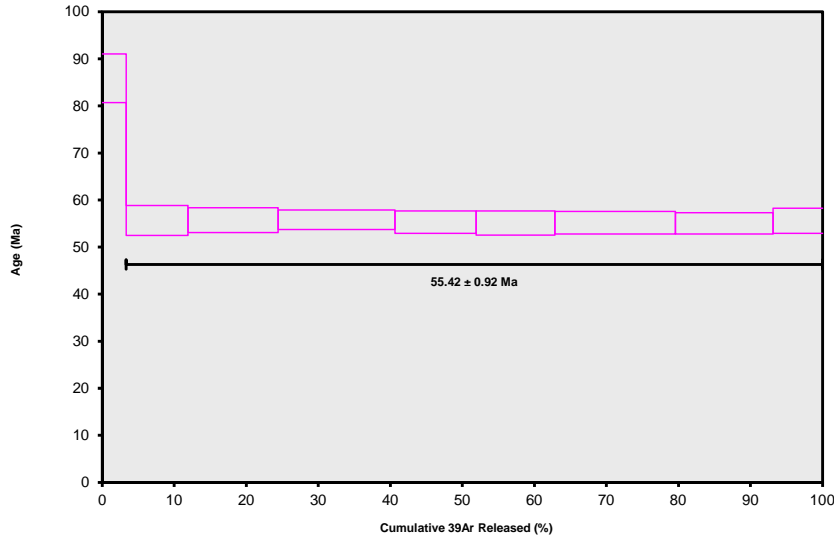

**Ar-Ages in Ma**

WEIGHTED PLATEAU  
 $55.42 \pm 0.92$   
 TOTAL FUSION  
 $56.43 \pm 0.92$   
 NORMAL ISOCHRON  
 $54.56 \pm 5.17$   
 INVERSE ISOCHRON  
 $54.58 \pm 5.18$

MSWD  
 0.07

**Sample Info**

plagioclase  
 Greenland  
 jh

IRR = OSU2C08  
 J =  $0.0019496 \pm 0.0000051$

09C393.AGE >>> 194233 >>> LARSEN PROJECT

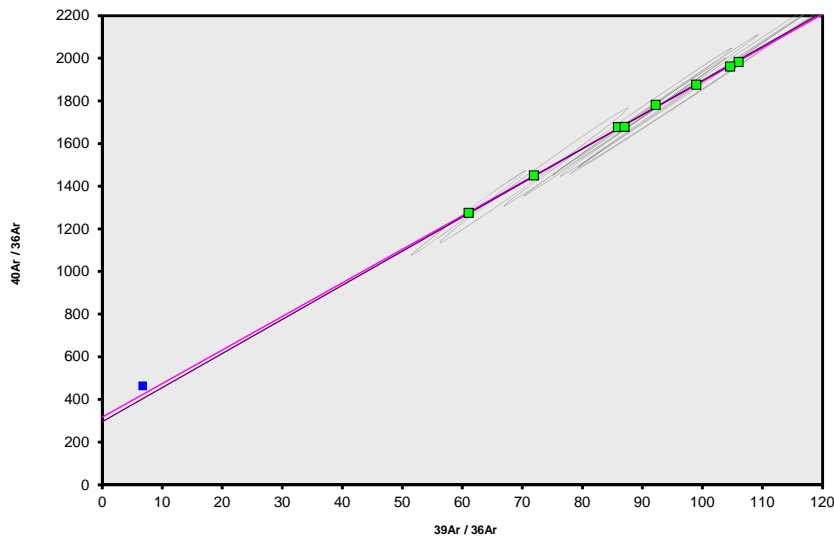

**Ar-Ages in Ma**

WEIGHTED PLATEAU  
 $55.42 \pm 0.92$   
 TOTAL FUSION  
 $56.43 \pm 0.92$   
 NORMAL ISOCHRON  
 $54.56 \pm 5.17$   
 INVERSE ISOCHRON  
 $54.58 \pm 5.18$

MSWD  
 0.06

**Sample Info**

plagioclase  
 Greenland  
 jh

IRR = OSU2C08  
 J =  $0.0019496 \pm 0.0000051$

09C393.AGE >>> 194233 >>> LARSEN PROJECT

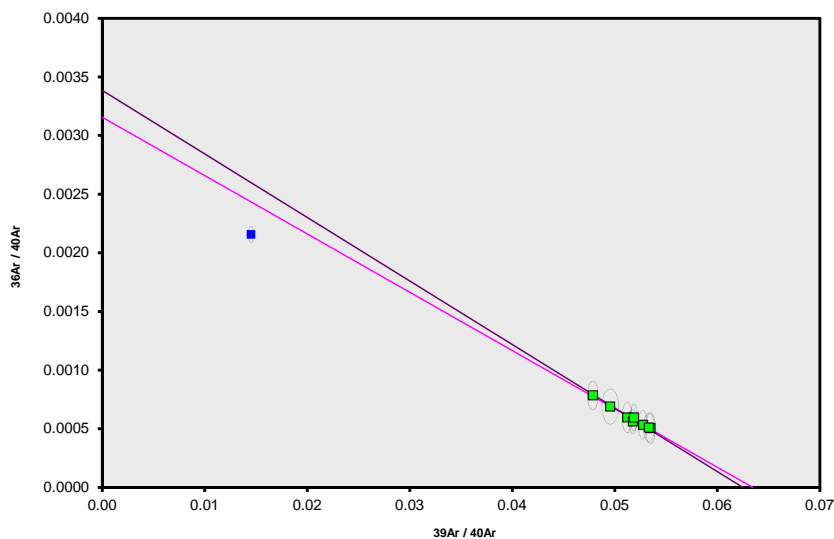

**Ar-Ages in Ma**

WEIGHTED PLATEAU  
 $55.42 \pm 0.92$   
 TOTAL FUSION  
 $56.43 \pm 0.92$   
 NORMAL ISOCHRON  
 $54.56 \pm 5.17$   
 INVERSE ISOCHRON  
 $54.58 \pm 5.18$

MSWD  
 0.06

**Sample Info**

plagioclase  
 Greenland  
 jh

IRR = OSU2C08  
 J =  $0.0019496 \pm 0.0000051$

Sample 194187, Lower Plateau Lava Series, Blæsedal, Wollaston Forland

09C74.AGE >>> 194187 >>> LARSEN PROJECT

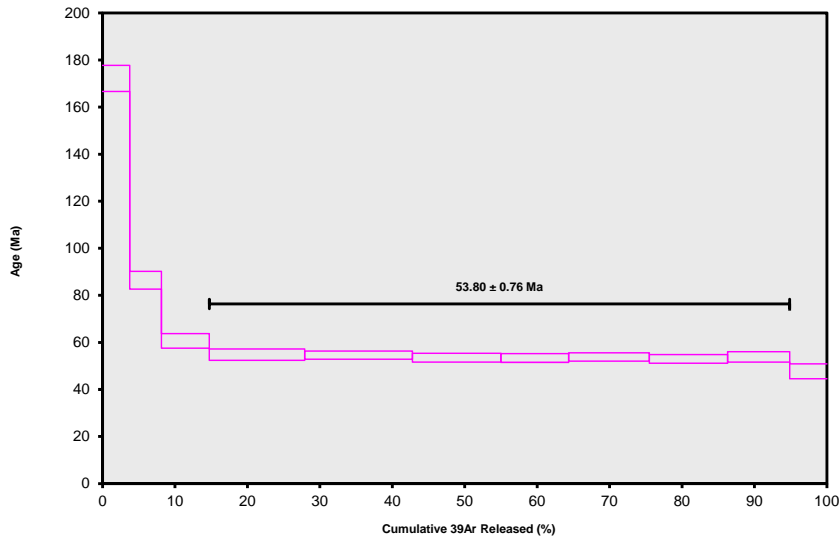

**Ar-Ages in Ma**

WEIGHTED PLATEAU  
53.80 ± 0.76  
TOTAL FUSION  
60.05 ± 0.76  
NORMAL ISOCHRON  
53.49 ± 2.04  
INVERSE ISOCHRON  
53.72 ± 1.92

MSWD  
0.43

**Sample Info**

plagioclase  
NE Greenland  
jh

IRR = OSU2C08  
J = 0.0020189 ±  
0.0000044

09C74.AGE >>> 194187 >>> LARSEN PROJECT

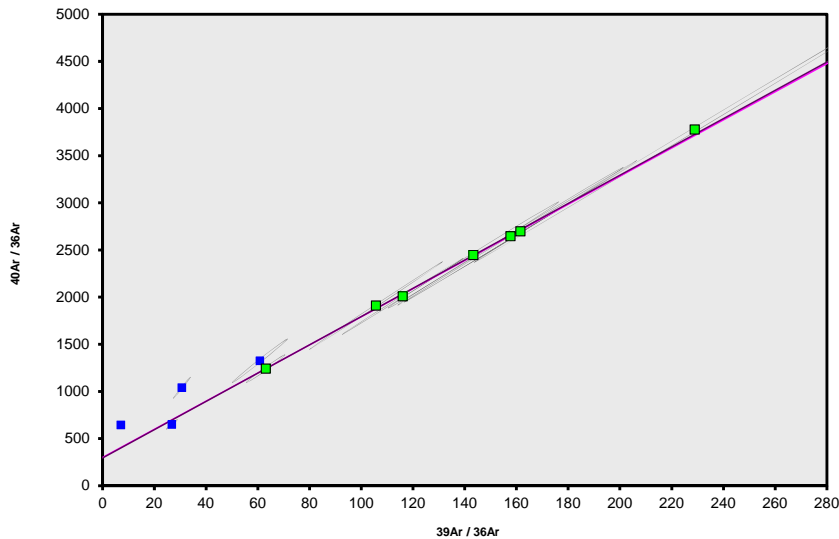

**Ar-Ages in Ma**

WEIGHTED PLATEAU  
53.80 ± 0.76  
TOTAL FUSION  
60.05 ± 0.76  
NORMAL ISOCHRON  
53.49 ± 2.04  
INVERSE ISOCHRON  
53.72 ± 1.92

MSWD  
0.45

**Sample Info**

plagioclase  
NE Greenland  
jh

IRR = OSU2C08  
J = 0.0020189 ±  
0.0000044

09C74.AGE >>> 194187 >>> LARSEN PROJECT

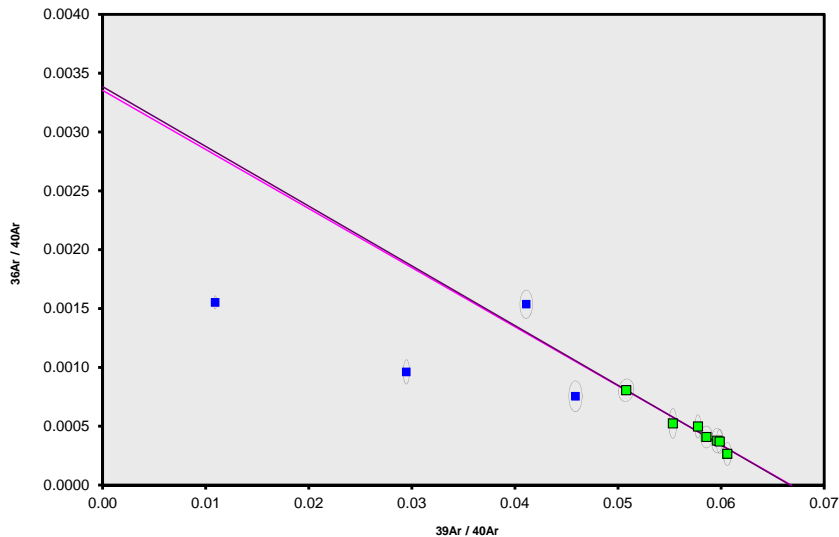

**Ar-Ages in Ma**

WEIGHTED PLATEAU  
53.80 ± 0.76  
TOTAL FUSION  
60.05 ± 0.76  
NORMAL ISOCHRON  
53.49 ± 2.04  
INVERSE ISOCHRON  
53.72 ± 1.92

MSWD  
0.51

**Sample Info**

plagioclase  
NE Greenland  
jh

IRR = OSU2C08  
J = 0.0020189 ±  
0.0000044

Sample 194194, Lower Plateau Lava Series, Blæsedal, Wollaston Forland

09C473.AGE >>> 194194 >>> LARSEN PROJECT

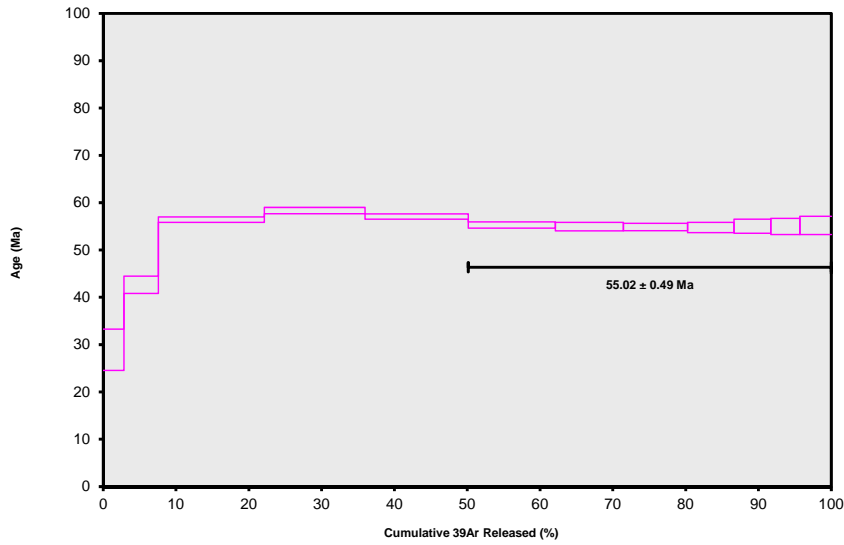

**Ar-Ages in Ma**

WEIGHTED PLATEAU  
55.02 ± 0.49  
TOTAL FUSION  
54.64 ± 0.43  
NORMAL ISOCHRON  
55.10 ± 0.77  
INVERSE ISOCHRON  
55.12 ± 0.76

MSWD  
0.17

**Sample Info**

groundmass  
Greenland  
jh

IRR = OSU2C08  
J = 0.0018985 ±  
0.0000055

09C473.AGE >>> 194194 >>> LARSEN PROJECT

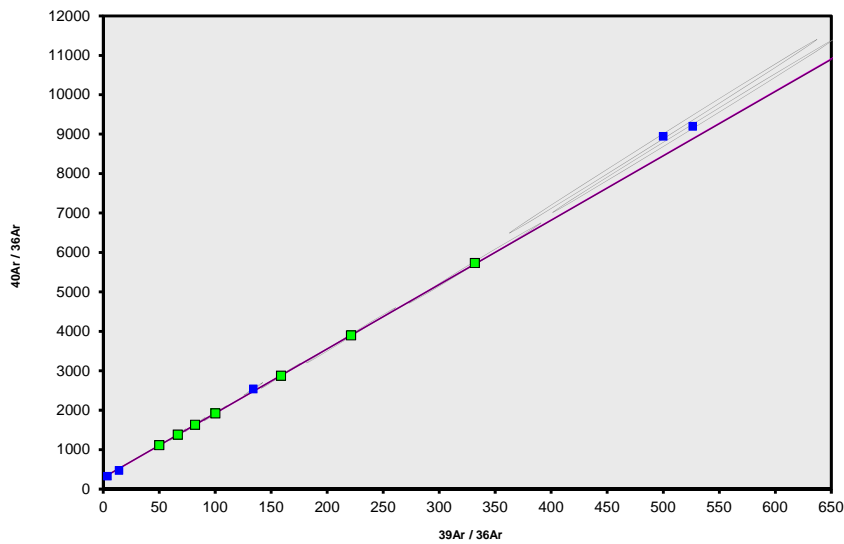

**Ar-Ages in Ma**

WEIGHTED PLATEAU  
55.02 ± 0.49  
TOTAL FUSION  
54.64 ± 0.43  
NORMAL ISOCHRON  
55.10 ± 0.77  
INVERSE ISOCHRON  
55.12 ± 0.76

MSWD  
0.18

**Sample Info**

groundmass  
Greenland  
jh

IRR = OSU2C08  
J = 0.0018985 ±  
0.0000055

09C473.AGE >>> 194194 >>> LARSEN PROJECT

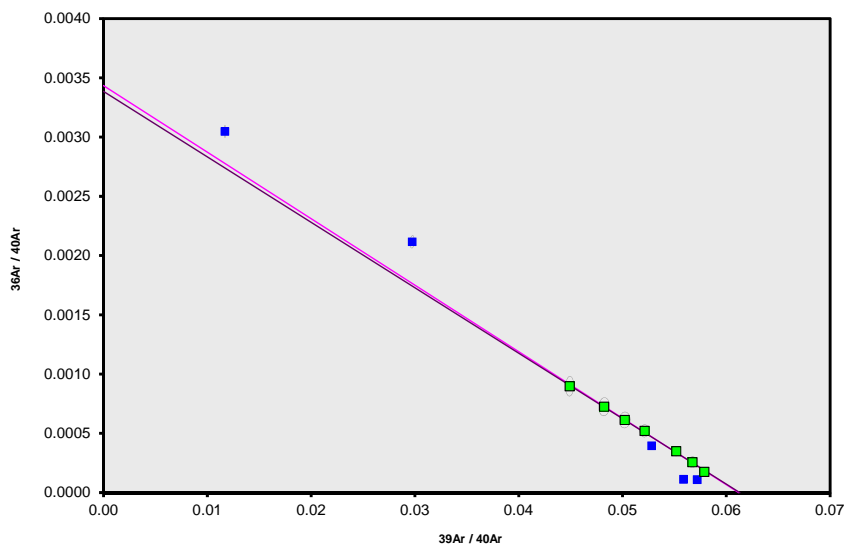

**Ar-Ages in Ma**

WEIGHTED PLATEAU  
55.02 ± 0.49  
TOTAL FUSION  
54.64 ± 0.43  
NORMAL ISOCHRON  
55.10 ± 0.77  
INVERSE ISOCHRON  
55.12 ± 0.76

MSWD  
0.18

**Sample Info**

groundmass  
Greenland  
jh

IRR = OSU2C08  
J = 0.0018985 ±  
0.0000055

Sample 95346, Lower Plateau Lava Series, Kap Stosch, Hold With Hope

09C4224.AGE >>> 95346 >>> LARSEN PROJECT

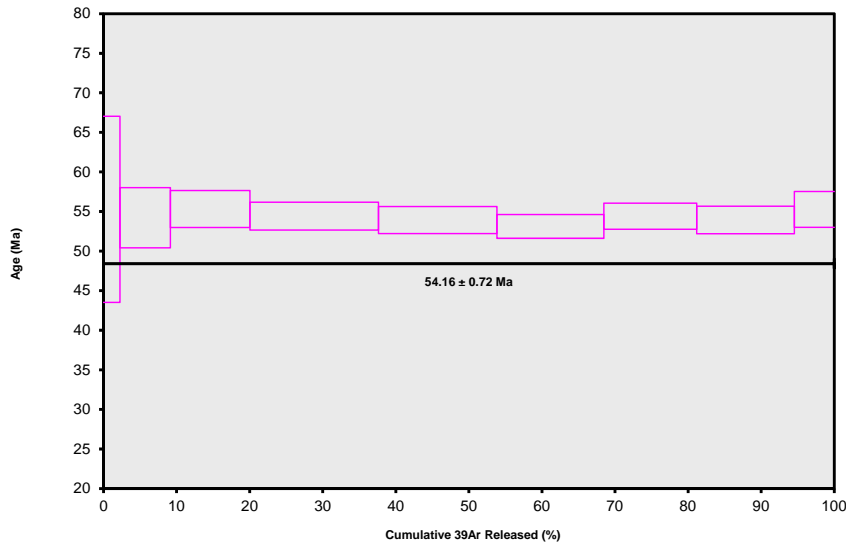

**Ar-Ages in Ma**

WEIGHTED PLATEAU  
54.16 ± 0.72  
TOTAL FUSION  
54.23 ± 0.78  
NORMAL ISOCHRON  
53.97 ± 0.85  
INVERSE ISOCHRON  
54.11 ± 0.84

MSWD  
0.53

**Sample Info**

plagioclase  
NE Greenland  
jh

IRR = OSU4D09  
J = 0.0017974 ±  
0.0000047

09C4224.AGE >>> 95346 >>> LARSEN PROJECT

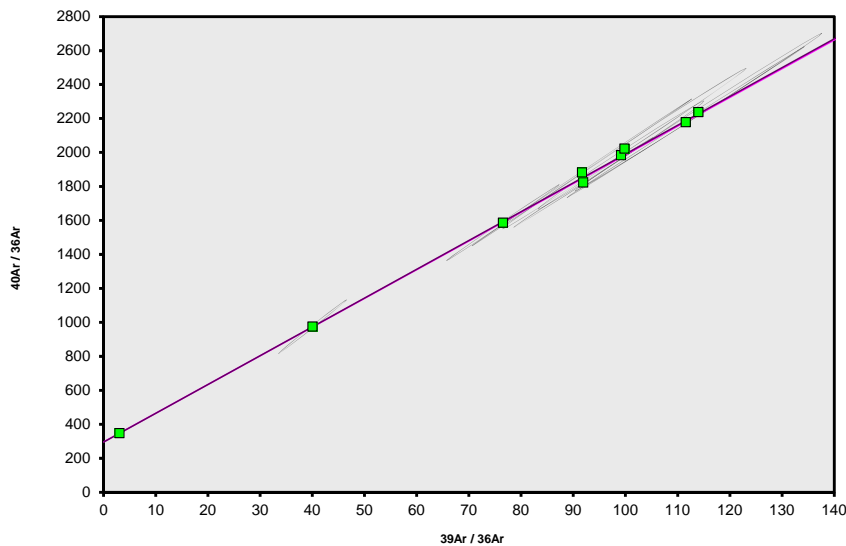

**Ar-Ages in Ma**

WEIGHTED PLATEAU  
54.16 ± 0.72  
TOTAL FUSION  
54.23 ± 0.78  
NORMAL ISOCHRON  
53.97 ± 0.85  
INVERSE ISOCHRON  
54.11 ± 0.84

MSWD  
0.59

**Sample Info**

plagioclase  
NE Greenland  
jh

IRR = OSU4D09  
J = 0.0017974 ±  
0.0000047

09C4224.AGE >>> 95346 >>> LARSEN PROJECT

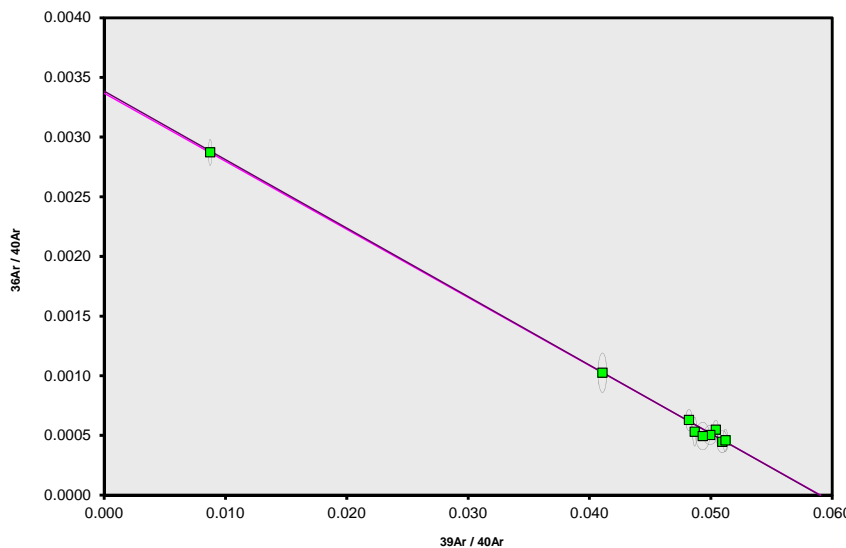

**Ar-Ages in Ma**

WEIGHTED PLATEAU  
54.16 ± 0.72  
TOTAL FUSION  
54.23 ± 0.78  
NORMAL ISOCHRON  
53.97 ± 0.85  
INVERSE ISOCHRON  
54.11 ± 0.84

MSWD  
0.60

**Sample Info**

plagioclase  
NE Greenland  
jh

IRR = OSU4D09  
J = 0.0017974 ±  
0.0000047

Sample 517303, Lower Plateau Lava Series, Tværelv, Hold With Hope

11C220.AGE >>> 517303 >>> LARSEN PROJECT

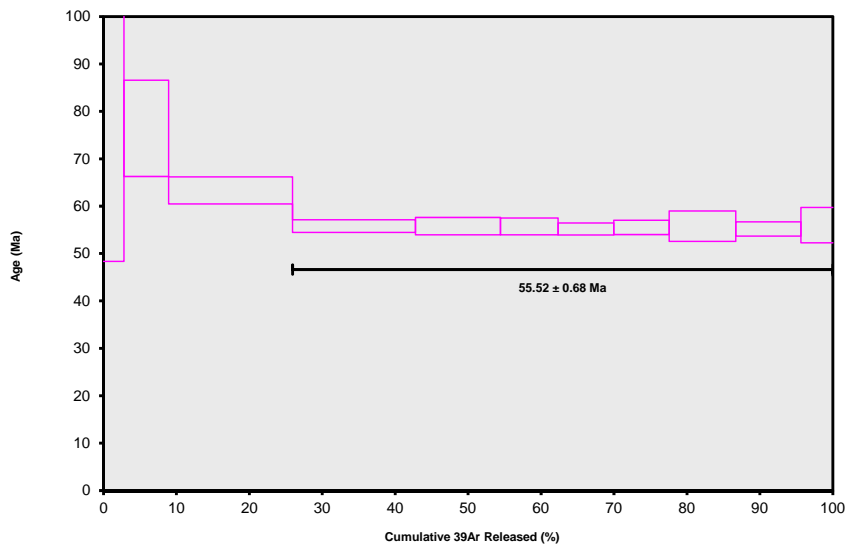

**Ar-Ages in Ma**

WEIGHTED PLATEAU  
55.52 ± 0.68  
TOTAL FUSION  
58.81 ± 1.29  
NORMAL ISOCHRON  
55.16 ± 2.78  
INVERSE ISOCHRON  
55.16 ± 2.78

MSWD  
0.12

**Sample Info**

groundmass  
W. Greenland  
jh

IRR = OSU3F10  
J = 0.0016616 ± 0.0000050

11C220.AGE >>> 517303 >>> LARSEN PROJECT

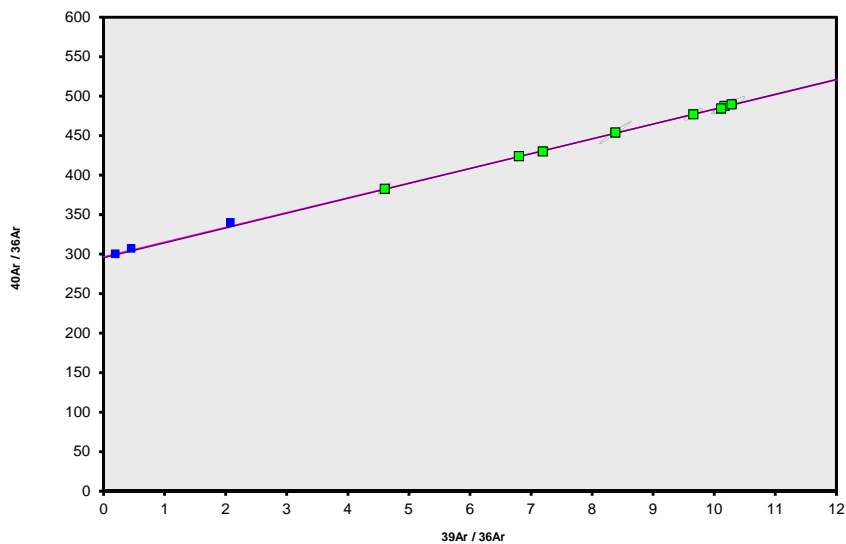

**Ar-Ages in Ma**

WEIGHTED PLATEAU  
55.52 ± 0.68  
TOTAL FUSION  
58.81 ± 1.29  
NORMAL ISOCHRON  
55.16 ± 2.78  
INVERSE ISOCHRON  
55.16 ± 2.78

MSWD  
0.13

**Sample Info**

groundmass  
W. Greenland  
jh

IRR = OSU3F10  
J = 0.0016616 ± 0.0000050

11C220.AGE >>> 517303 >>> LARSEN PROJECT

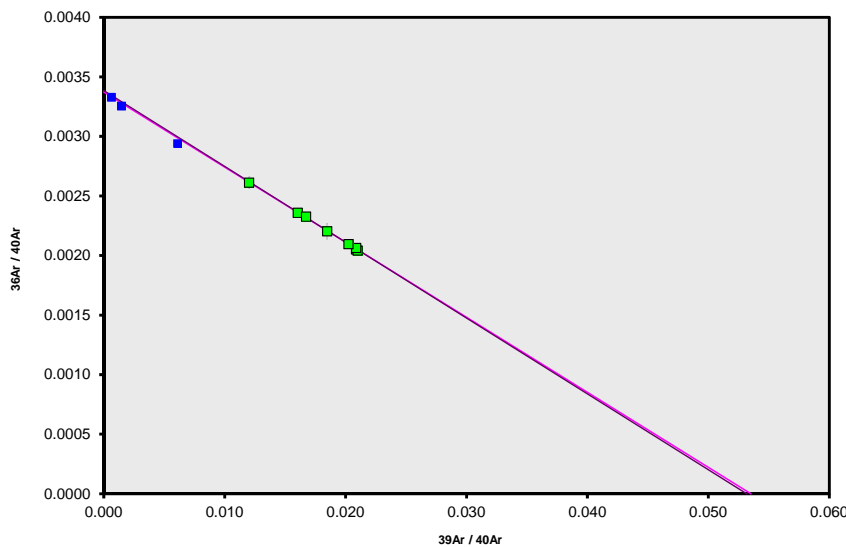

**Ar-Ages in Ma**

WEIGHTED PLATEAU  
55.52 ± 0.68  
TOTAL FUSION  
58.81 ± 1.29  
NORMAL ISOCHRON  
55.16 ± 2.78  
INVERSE ISOCHRON  
55.16 ± 2.78

MSWD  
0.13

**Sample Info**

groundmass  
W. Greenland  
jh

IRR = OSU3F10  
J = 0.0016616 ± 0.0000050

Sample 239531, Lower Plateau Lava Series, Kap Mackenzie, Geographical Society Ø

11C200.AGE >>> 239531 >>> LARSEN PROJECT

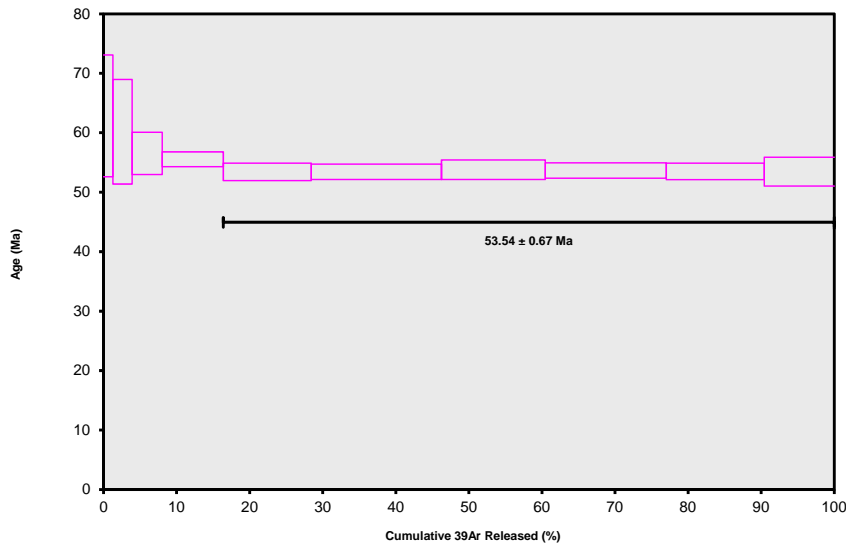

**Ar-Ages in Ma**

WEIGHTED PLATEAU  
53.54 ± 0.67  
TOTAL FUSION  
54.13 ± 0.68  
NORMAL ISOCHRON  
53.29 ± 2.14  
INVERSE ISOCHRON  
53.30 ± 2.14

MSWD  
0.04

**Sample Info**

plagioclase  
W. Greenland  
jh

IRR = OSU3F10  
J = 0.0017115 ±  
0.0000048

11C200.AGE >>> 239531 >>> LARSEN PROJECT

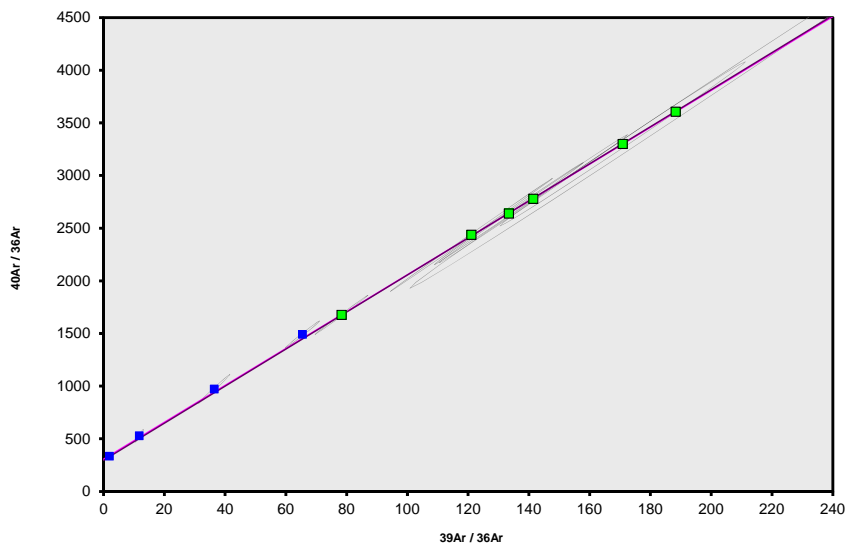

**Ar-Ages in Ma**

WEIGHTED PLATEAU  
53.54 ± 0.67  
TOTAL FUSION  
54.13 ± 0.68  
NORMAL ISOCHRON  
53.29 ± 2.14  
INVERSE ISOCHRON  
53.30 ± 2.14

MSWD  
0.03

**Sample Info**

plagioclase  
W. Greenland  
jh

IRR = OSU3F10  
J = 0.0017115 ±  
0.0000048

11C200.AGE >>> 239531 >>> LARSEN PROJECT

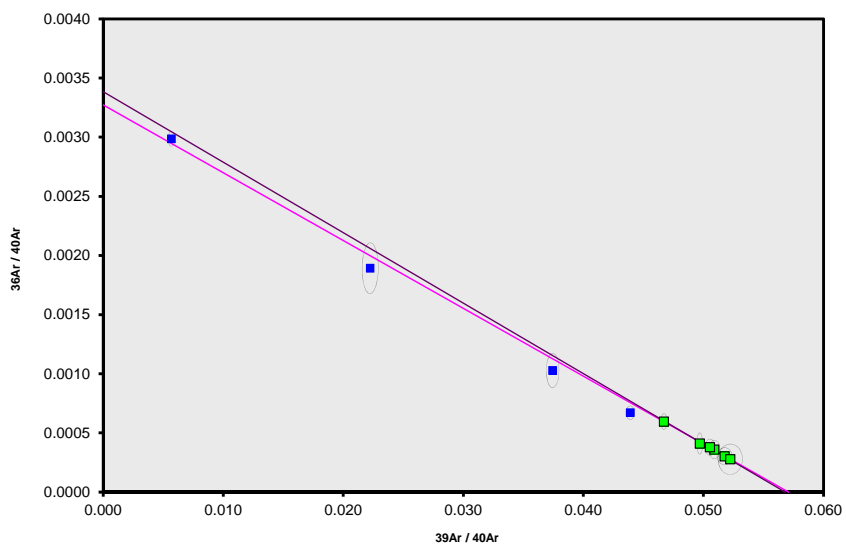

**Ar-Ages in Ma**

WEIGHTED PLATEAU  
53.54 ± 0.67  
TOTAL FUSION  
54.13 ± 0.68  
NORMAL ISOCHRON  
53.29 ± 2.14  
INVERSE ISOCHRON  
53.30 ± 2.14

MSWD  
0.03

**Sample Info**

plagioclase  
W. Greenland  
jh

IRR = OSU3F10  
J = 0.0017115 ±  
0.0000048

Sample 194150, Upper Plateau Lava Series, Tobias Dal, Hold With Hope

09C101.AGE >>> 194150 >>> LARSEN PROJECT

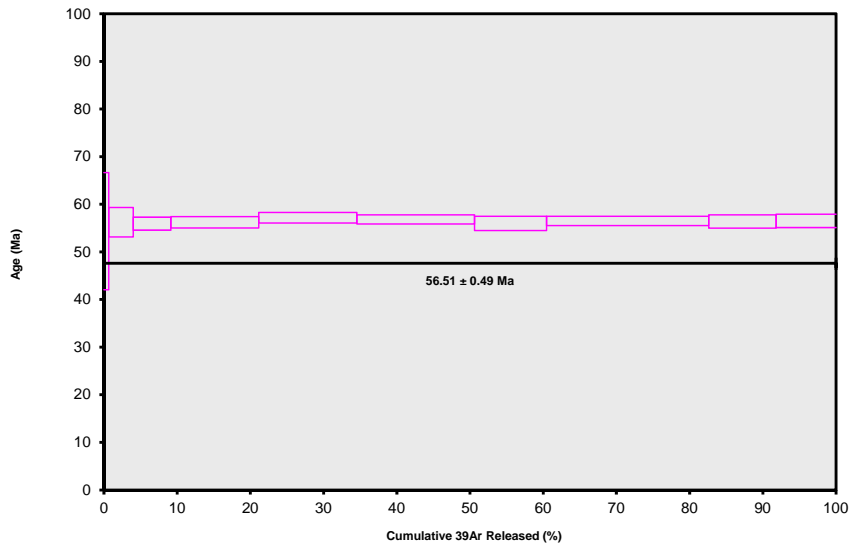

**Ar-Ages in Ma**

WEIGHTED PLATEAU  
56.51 ± 0.49  
TOTAL FUSION  
56.49 ± 0.50  
NORMAL ISOCHRON  
56.33 ± 0.69  
INVERSE ISOCHRON  
56.50 ± 0.71

MSWD  
0.39

**Sample Info**

plagioclase  
NE Greenland  
jh

IRR = OSU2C08  
J = 0.0019977 ±  
0.0000046

09C101.AGE >>> 194150 >>> LARSEN PROJECT

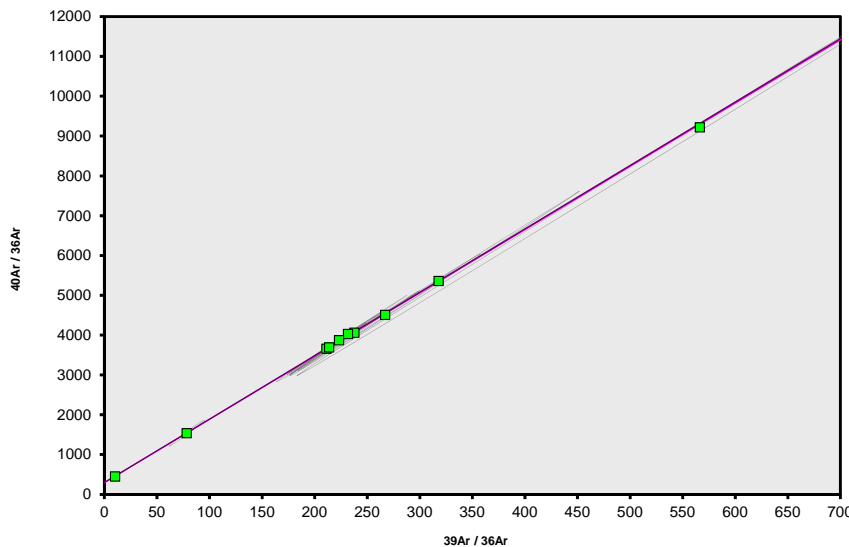

**Ar-Ages in Ma**

WEIGHTED PLATEAU  
56.51 ± 0.49  
TOTAL FUSION  
56.49 ± 0.50  
NORMAL ISOCHRON  
56.33 ± 0.69  
INVERSE ISOCHRON  
56.50 ± 0.71

MSWD  
0.45

**Sample Info**

plagioclase  
NE Greenland  
jh

IRR = OSU2C08  
J = 0.0019977 ±  
0.0000046

09C101.AGE >>> 194150 >>> LARSEN PROJECT

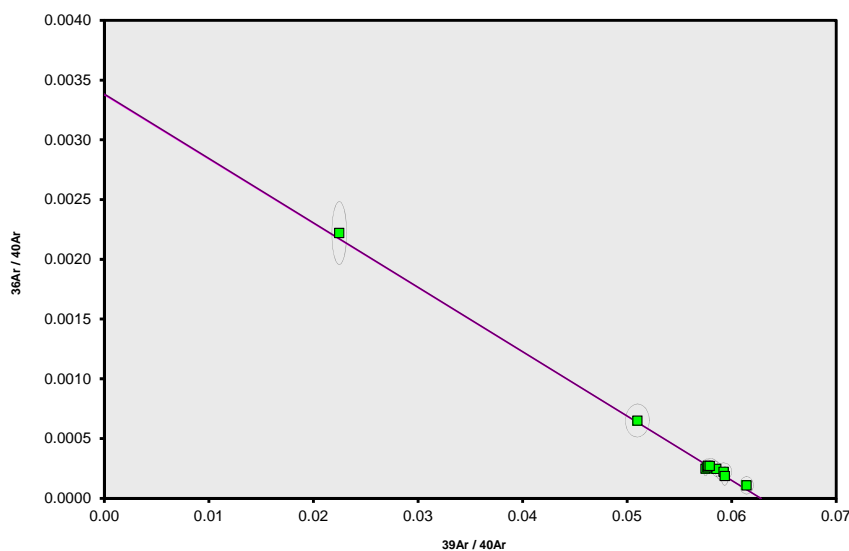

**Ar-Ages in Ma**

WEIGHTED PLATEAU  
56.51 ± 0.49  
TOTAL FUSION  
56.49 ± 0.50  
NORMAL ISOCHRON  
56.33 ± 0.69  
INVERSE ISOCHRON  
56.50 ± 0.71

MSWD  
0.44

**Sample Info**

plagioclase  
NE Greenland  
jh

IRR = OSU2C08  
J = 0.0019977 ±  
0.0000046

Sample 1980.274, Upper Plateau Lava Series, Bontekoe Ø

09C4185.AGE >>> 1980.274 >>> LARSEN PROJECT

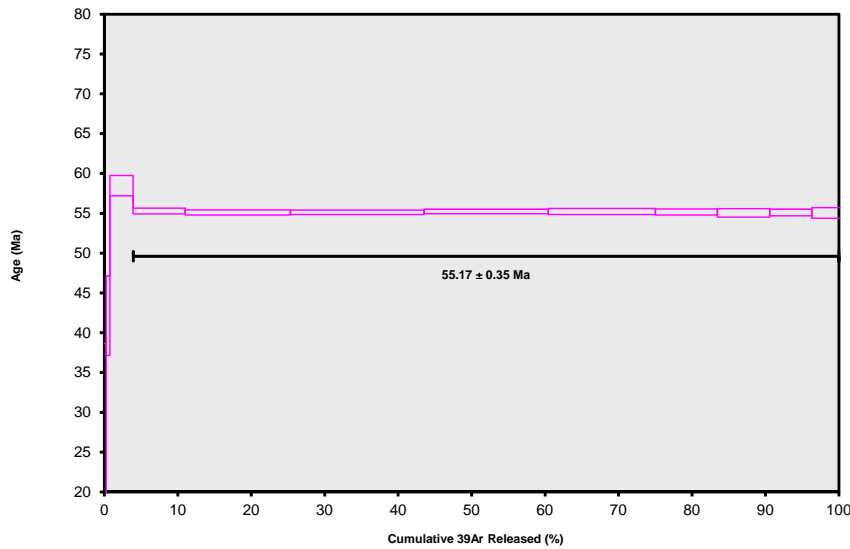

**Ar-Ages in Ma**

WEIGHTED PLATEAU  
55.17 ± 0.35  
TOTAL FUSION  
55.12 ± 0.35  
NORMAL ISOCHRON  
55.12 ± 0.40  
INVERSE ISOCHRON  
55.12 ± 0.40

MSWD  
0.18

**Sample Info**

groundmass  
NE Greenland  
jh

IRR = OSU4C09  
J = 0.0017490 ±  
0.0000052

09C4185.AGE >>> 1980.274 >>> LARSEN PROJECT

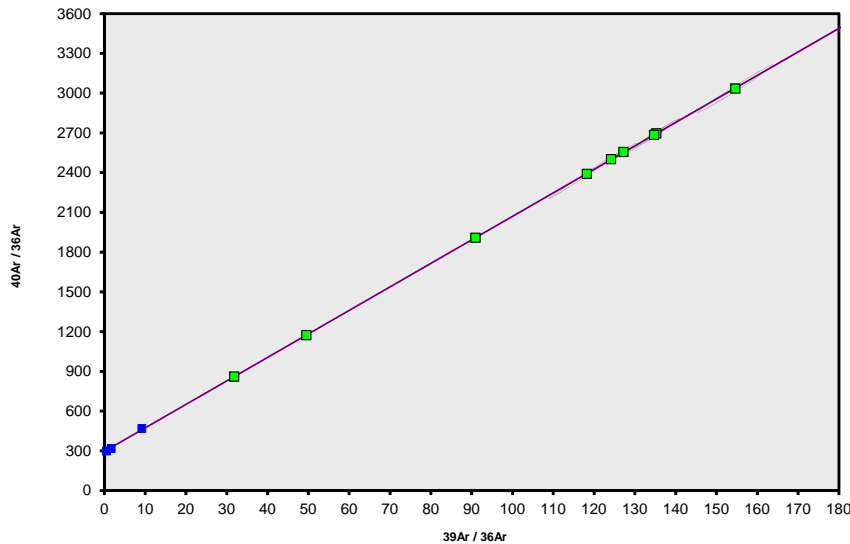

**Ar-Ages in Ma**

WEIGHTED PLATEAU  
55.17 ± 0.35  
TOTAL FUSION  
55.12 ± 0.35  
NORMAL ISOCHRON  
55.12 ± 0.40  
INVERSE ISOCHRON  
55.12 ± 0.40

MSWD  
0.18

**Sample Info**

groundmass  
NE Greenland  
jh

IRR = OSU4C09  
J = 0.0017490 ±  
0.0000052

09C4185.AGE >>> 1980.274 >>> LARSEN PROJECT

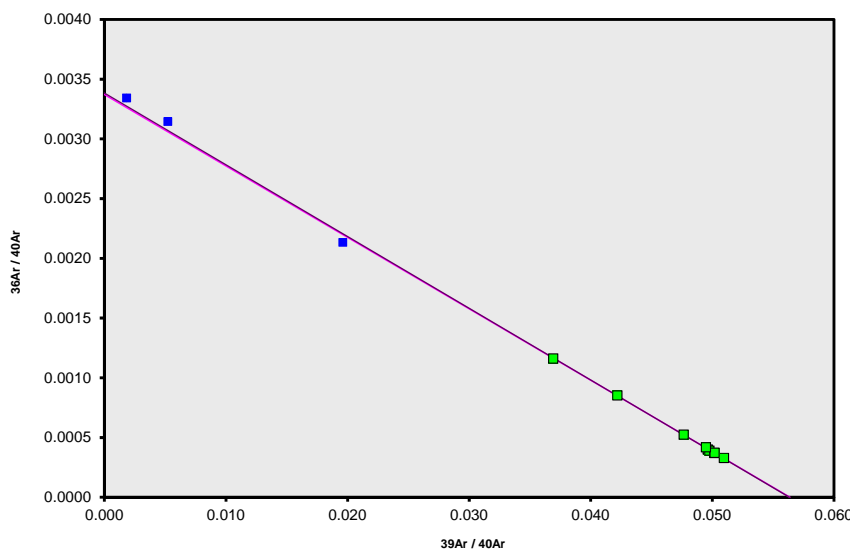

**Ar-Ages in Ma**

WEIGHTED PLATEAU  
55.17 ± 0.35  
TOTAL FUSION  
55.12 ± 0.35  
NORMAL ISOCHRON  
55.12 ± 0.40  
INVERSE ISOCHRON  
55.12 ± 0.40

MSWD  
0.18

**Sample Info**

groundmass  
NE Greenland  
jh

IRR = OSU4C09  
J = 0.0017490 ±  
0.0000052



Sample 421302, melilitite plug, Louise Boyd Land, nunatak zone

99C0130.AGE >>> GGU 421302 5C4-98 >>> LARSEN PROJECT

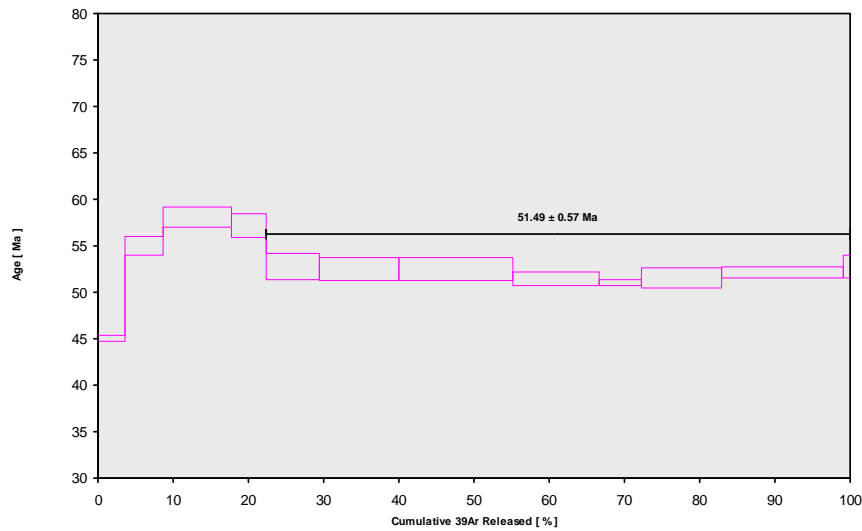

**Ar-Ages in Ma**

WEIGHTED PLATEAU  
51.49 ± 0.57

TOTAL FUSION  
52.74 ± 0.47

NORMAL ISOCHRON  
52.08 ± 1.60

INVERSE ISOCHRON  
49.80 ± 1.38

MSWD (PROBABILITY)  
3.84 (0%)

**Sample Info**

whole rock  
E Greenland  
Bob Duncan

IRR = OSU5C98

99C0130.AGE >>> GGU 421302 5C4-98 >>> LARSEN PROJECT

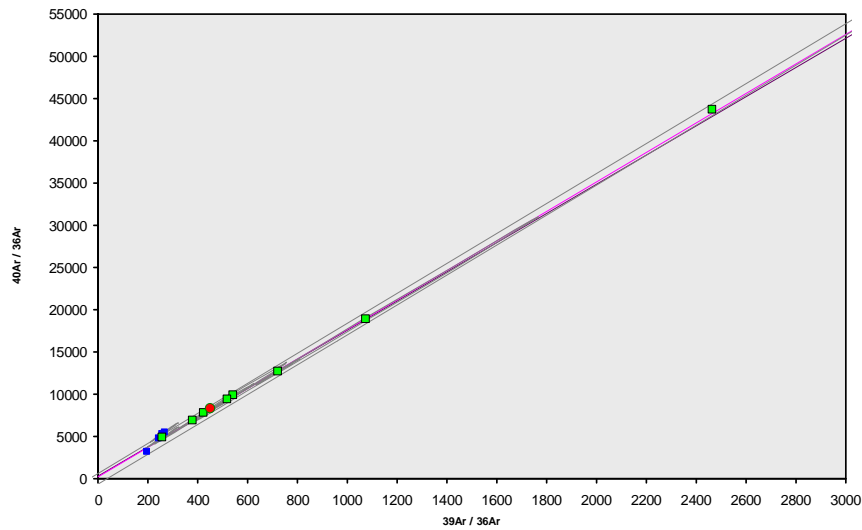

**Ar-Ages in Ma**

WEIGHTED PLATEAU  
51.49 ± 0.57

TOTAL FUSION  
52.74 ± 0.47

NORMAL ISOCHRON  
52.08 ± 1.60

INVERSE ISOCHRON  
49.80 ± 1.38

MSWD (PROBABILITY)  
6.89 (0%)

40AR/36AR INTERCEPT

**Sample Info**

whole rock  
E Greenland  
Bob Duncan

IRR = OSU5C98

99C0130.AGE >>> GGU 421302 5C4-98 >>> LARSEN PROJECT

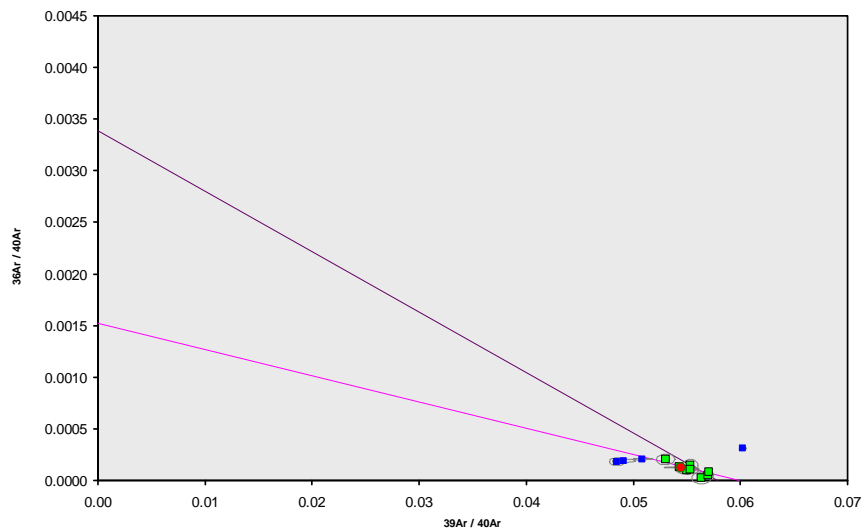

**Ar-Ages in Ma**

WEIGHTED PLATEAU  
51.49 ± 0.57

TOTAL FUSION  
52.74 ± 0.47

NORMAL ISOCHRON  
52.08 ± 1.60

INVERSE ISOCHRON  
49.80 ± 1.38

MSWD (PROBABILITY)  
1.83 (9%)

SPREADING FACTOR

**Sample Info**

whole rock  
E Greenland  
Bob Duncan

IRR = OSU5C98

Sample 452434, melilitite lava or plug, Hobbs Land, nunatak zone

99C0261.AGE >>> GGU 452434 5D9-98 >>> LARSEN PROJECT

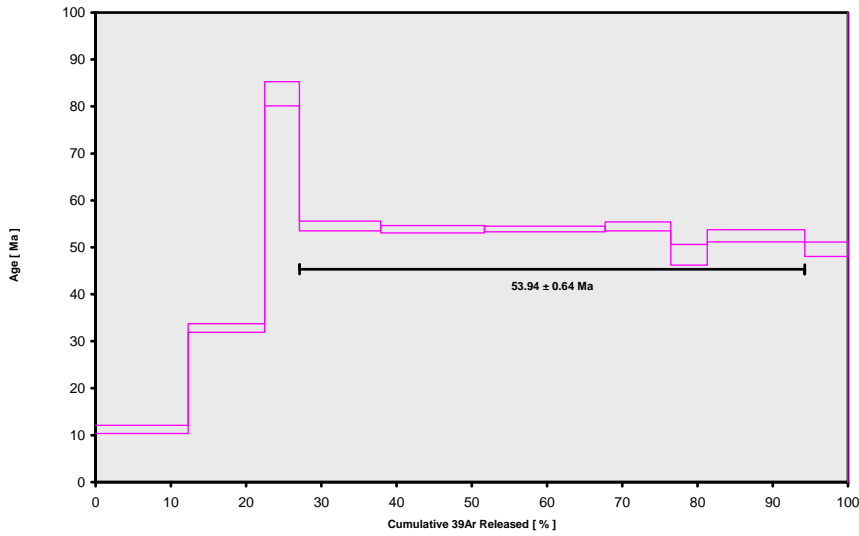

**Ar-Ages in Ma**

WEIGHTED PLATEAU  
53.94 ± 0.64  
TOTAL FUSION  
47.32 ± 0.48  
NORMAL ISOCHRON  
53.30 ± 1.89  
INVERSE ISOCHRON  
53.40 ± 1.83

MSWD (PROBABILITY)  
1.93 (10%)

**Sample Info**

glass  
Greenland  
Bob Duncan

IRR = OSU5D98  
L = 0.00162230 \*

99C0261.AGE >>> GGU 452434 5D9-98 >>> LARSEN PROJECT

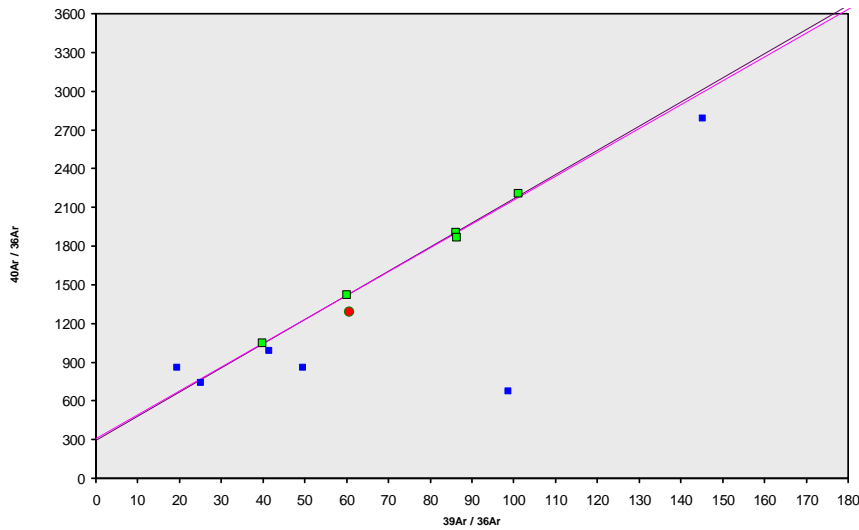

**Ar-Ages in Ma**

WEIGHTED PLATEAU  
53.94 ± 0.64  
TOTAL FUSION  
47.32 ± 0.48  
NORMAL ISOCHRON  
53.30 ± 1.89  
INVERSE ISOCHRON  
53.40 ± 1.83

MSWD (PROBABILITY)  
2.31 (7%)

40AR/36AR INTERCEPT

**Sample Info**

glass  
Greenland  
Bob Duncan

IRR = OSU5D98

99C0261.AGE >>> GGU 452434 5D9-98 >>> LARSEN PROJECT

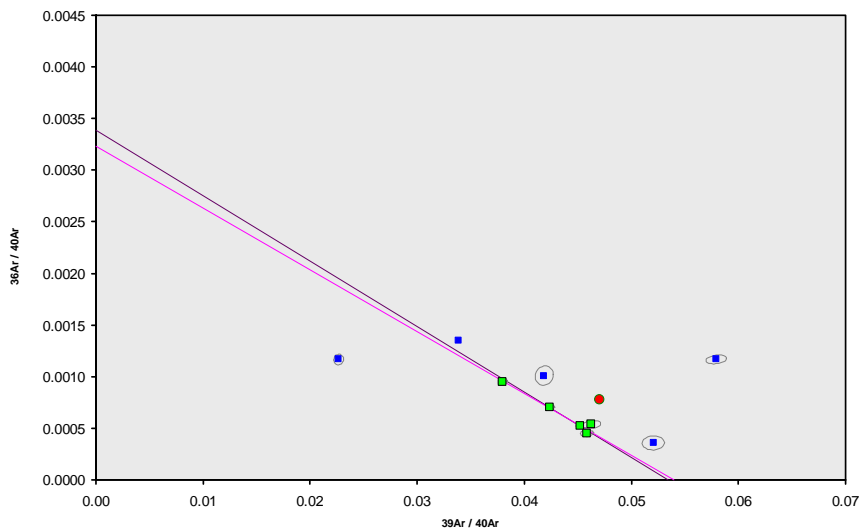

**Ar-Ages in Ma**

WEIGHTED PLATEAU  
53.94 ± 0.64  
TOTAL FUSION  
47.32 ± 0.48  
NORMAL ISOCHRON  
53.30 ± 1.89  
INVERSE ISOCHRON  
53.40 ± 1.83

MSWD (PROBABILITY)  
2.20 (9%)

SPREADING FACTOR

**Sample Info**

glass  
Greenland  
Bob Duncan

IRR = OSU5D98

Sample 194196, sill, east coast of Shannon

09C87.AGE >>> 194196 >>> LARSEN PROJECT

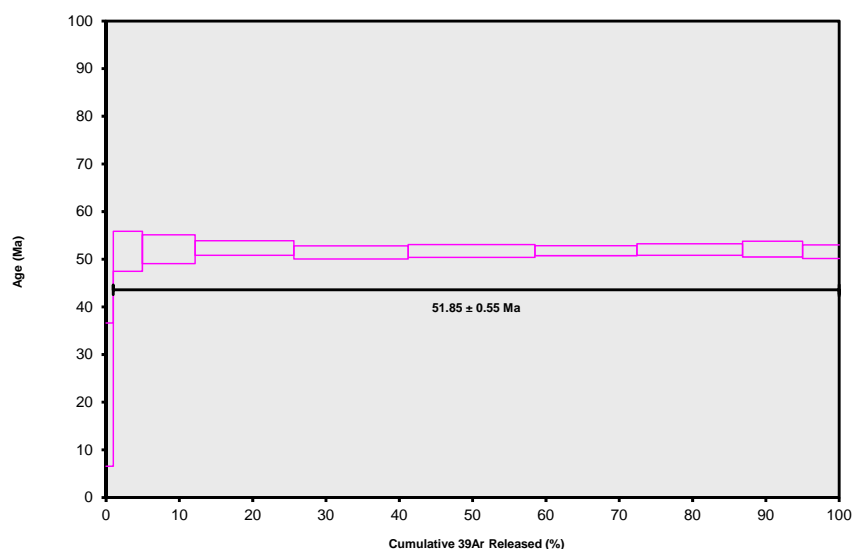

Ar-Ages in Ma

WEIGHTED PLATEAU  
 $51.85 \pm 0.55$   
 TOTAL FUSION  
 $51.58 \pm 0.61$   
 NORMAL ISOCHRON  
 $51.82 \pm 1.12$   
 INVERSE ISOCHRON  
 $51.82 \pm 1.12$

MSWD  
 0.15

Sample Info

plagioclase  
 NE Greenland  
 jh

IRR = OSU2C08  
 $J = 0.0019726 \pm 0.0000047$

09C87.AGE >>> 194196 >>> LARSEN PROJECT

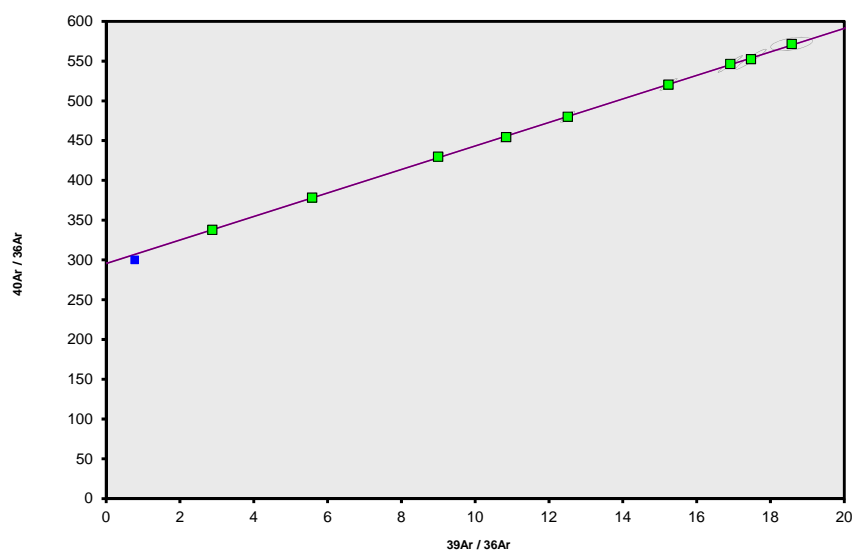

Ar-Ages in Ma

WEIGHTED PLATEAU  
 $51.85 \pm 0.55$   
 TOTAL FUSION  
 $51.58 \pm 0.61$   
 NORMAL ISOCHRON  
 $51.82 \pm 1.12$   
 INVERSE ISOCHRON  
 $51.82 \pm 1.12$

MSWD  
 0.17

Sample Info

plagioclase  
 NE Greenland  
 jh

IRR = OSU2C08  
 $J = 0.0019726 \pm 0.0000047$

09C87.AGE >>> 194196 >>> LARSEN PROJECT

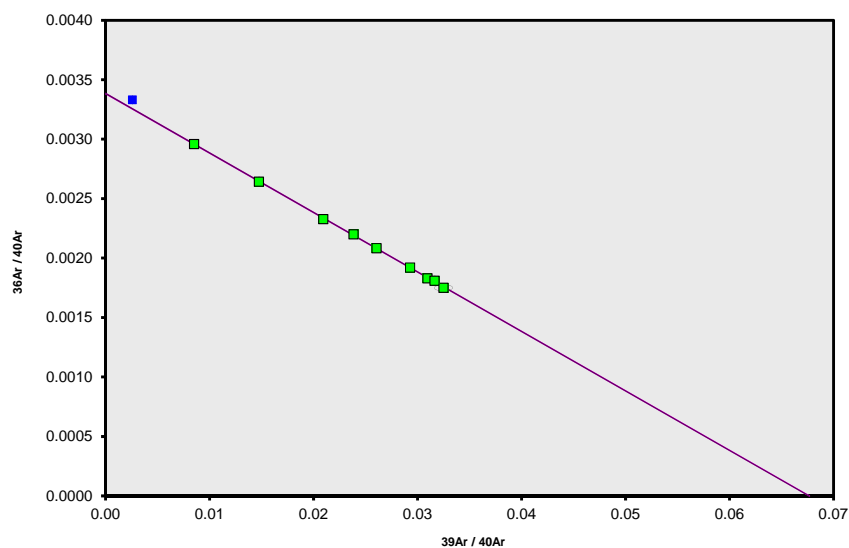

Ar-Ages in Ma

WEIGHTED PLATEAU  
 $51.85 \pm 0.55$   
 TOTAL FUSION  
 $51.58 \pm 0.61$   
 NORMAL ISOCHRON  
 $51.82 \pm 1.12$   
 INVERSE ISOCHRON  
 $51.82 \pm 1.12$

MSWD  
 0.17

Sample Info

plagioclase  
 NE Greenland  
 jh

IRR = OSU2C08  
 $J = 0.0019726 \pm 0.0000047$

Sample 194207, sill, Bass Rock, Lille Pendulum

09C404.AGE >>> 194207 >>> LARSEN PROJECT

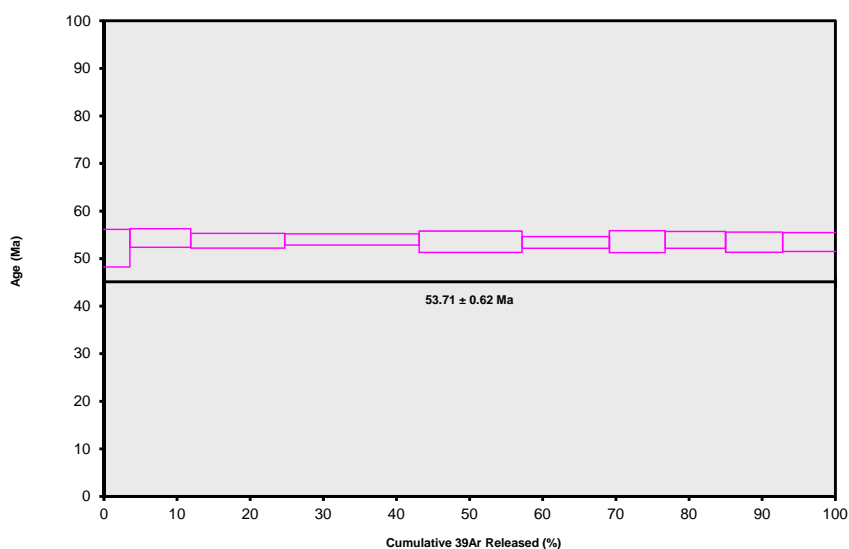

**Ar-Ages in Ma**

WEIGHTED PLATEAU  
 $53.71 \pm 0.62$   
 TOTAL FUSION  
 $53.68 \pm 0.66$   
 NORMAL ISOCHRON  
 $53.93 \pm 0.88$   
 INVERSE ISOCHRON  
 $53.95 \pm 0.88$

MSWD  
 0.19

**Sample Info**

plagioclase  
 Greenland  
 jh

IRR = OSU2C08  
 $J = 0.0019260 \pm 0.0000052$

09C404.AGE >>> 194207 >>> LARSEN PROJECT

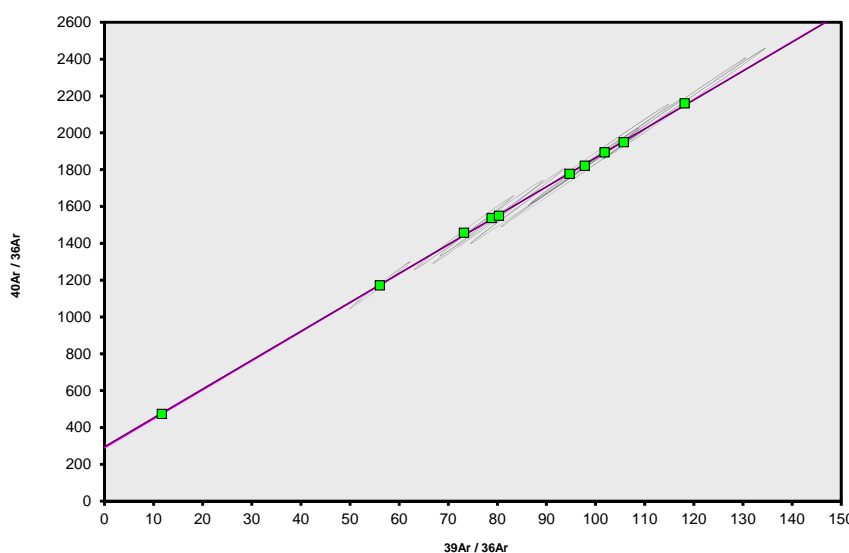

**Ar-Ages in Ma**

WEIGHTED PLATEAU  
 $53.71 \pm 0.62$   
 TOTAL FUSION  
 $53.68 \pm 0.66$   
 NORMAL ISOCHRON  
 $53.93 \pm 0.88$   
 INVERSE ISOCHRON  
 $53.95 \pm 0.88$

MSWD  
 0.14

**Sample Info**

plagioclase  
 Greenland  
 jh

IRR = OSU2C08  
 $J = 0.0019260 \pm 0.0000052$

09C404.AGE >>> 194207 >>> LARSEN PROJECT

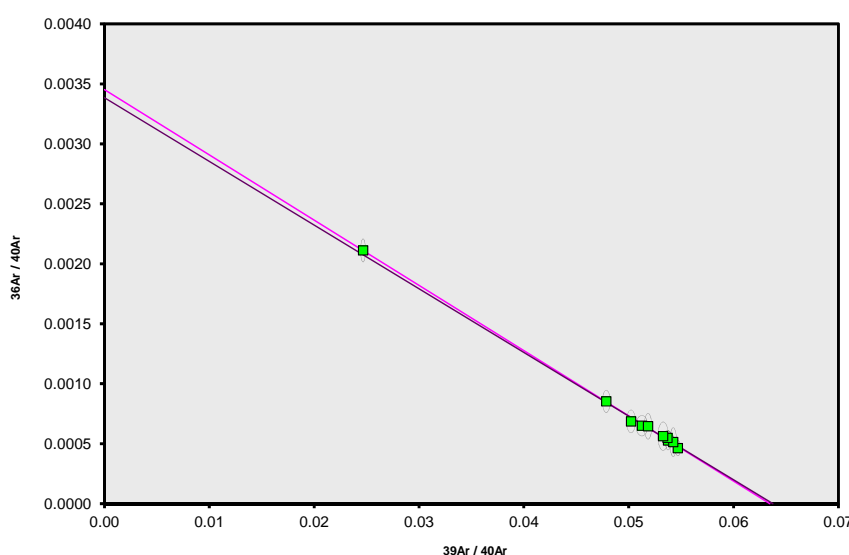

**Ar-Ages in Ma**

WEIGHTED PLATEAU  
 $53.71 \pm 0.62$   
 TOTAL FUSION  
 $53.68 \pm 0.66$   
 NORMAL ISOCHRON  
 $53.93 \pm 0.88$   
 INVERSE ISOCHRON  
 $53.95 \pm 0.88$

MSWD  
 0.15

**Sample Info**

plagioclase  
 Greenland  
 jh

IRR = OSU2C08  
 $J = 0.0019260 \pm 0.0000052$

Sample 517355, sill, Kefersteinsberg, Sabine Ø

11C144.AGE >>> 517355 >>> LARSEN PROJECT

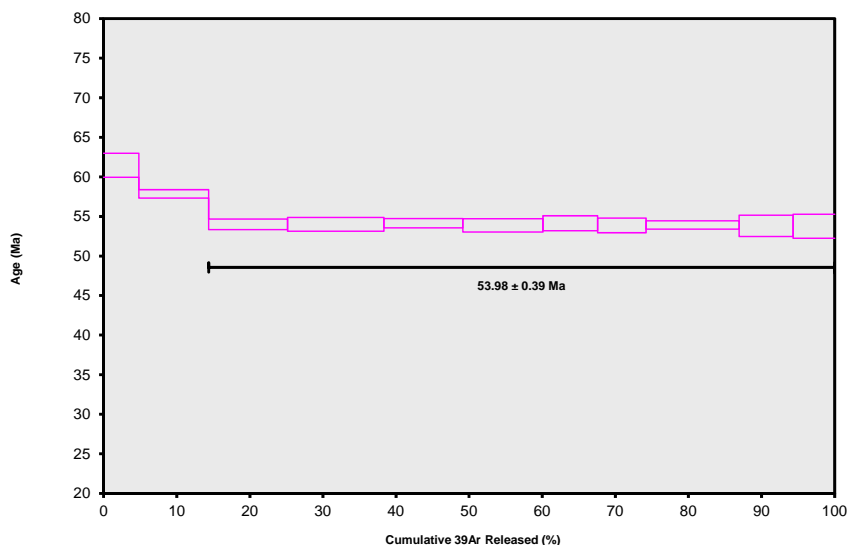

**Ar-Ages in Ma**

WEIGHTED PLATEAU  
53.98 ± 0.39  
TOTAL FUSION  
54.70 ± 0.39  
NORMAL ISOCHRON  
54.24 ± 0.95  
INVERSE ISOCHRON  
54.24 ± 0.94

MSWD  
0.10

**Sample Info**

plagioclase  
E. Greenland  
jh

IRR = OSU3F10  
J = 0.0017377 ±  
0.0000047

11C144.AGE >>> 517355 >>> LARSEN PROJECT

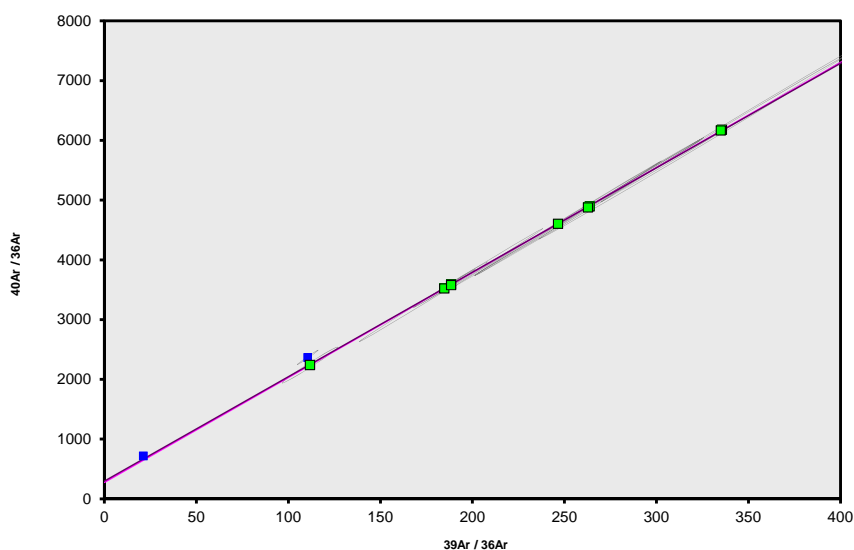

**Ar-Ages in Ma**

WEIGHTED PLATEAU  
53.98 ± 0.39  
TOTAL FUSION  
54.70 ± 0.39  
NORMAL ISOCHRON  
54.24 ± 0.95  
INVERSE ISOCHRON  
54.24 ± 0.94

MSWD  
0.07

**Sample Info**

plagioclase  
E. Greenland  
jh

IRR = OSU3F10  
J = 0.0017377 ±  
0.0000047

11C144.AGE >>> 517355 >>> LARSEN PROJECT

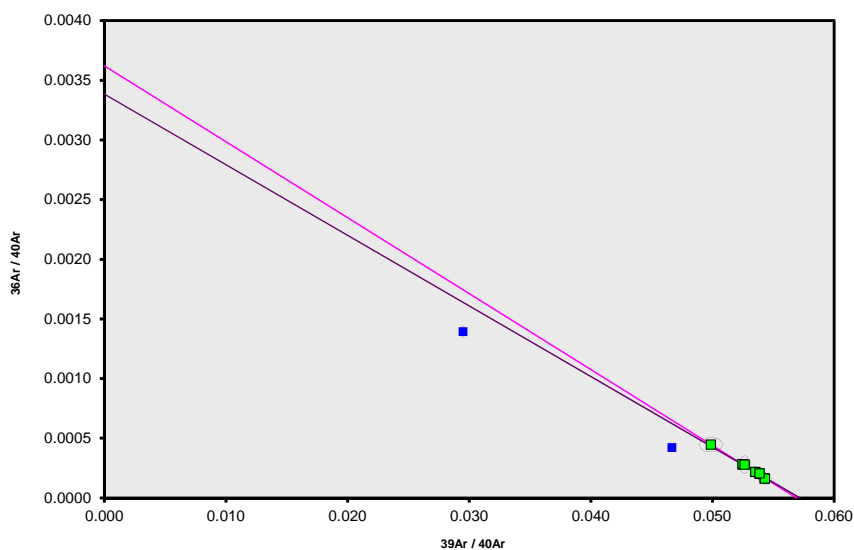

**Ar-Ages in Ma**

WEIGHTED PLATEAU  
53.98 ± 0.39  
TOTAL FUSION  
54.70 ± 0.39  
NORMAL ISOCHRON  
54.24 ± 0.95  
INVERSE ISOCHRON  
54.24 ± 0.94

MSWD  
0.07

**Sample Info**

plagioclase  
E. Greenland  
jh

IRR = OSU3F10  
J = 0.0017377 ±  
0.0000047

Sample 475286, sill, Hvalrosø

09C4248.AGE >>> 475286 >>> LARSEN PROJECT

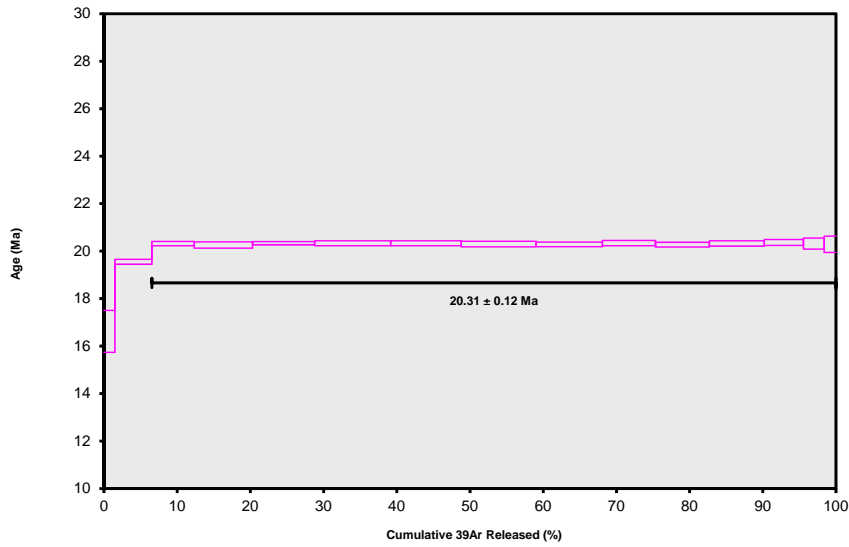

**Ar-Ages in Ma**

WEIGHTED PLATEAU  
 $20.31 \pm 0.12$   
 TOTAL FUSION  
 $20.22 \pm 0.13$   
 NORMAL ISOCHRON  
 $20.32 \pm 0.17$   
 INVERSE ISOCHRON  
 $20.32 \pm 0.17$

MSWD  
 0.27

**Sample Info**

vein feldspar  
 NE Greenland  
 jh

IRR = OSU4D09  
 $J = 0.0017565 \pm 0.0000053$

09C4248.AGE >>> 475286 >>> LARSEN PROJECT

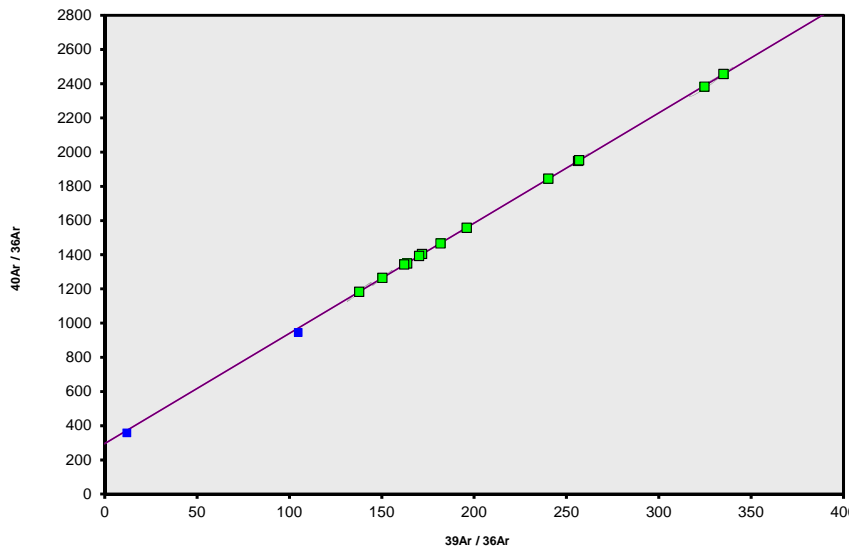

**Ar-Ages in Ma**

WEIGHTED PLATEAU  
 $20.31 \pm 0.12$   
 TOTAL FUSION  
 $20.22 \pm 0.13$   
 NORMAL ISOCHRON  
 $20.32 \pm 0.17$   
 INVERSE ISOCHRON  
 $20.32 \pm 0.17$

MSWD  
 0.29

**Sample Info**

vein feldspar  
 NE Greenland  
 jh

IRR = OSU4D09  
 $J = 0.0017565 \pm 0.0000053$

09C4248.AGE >>> 475286 >>> LARSEN PROJECT

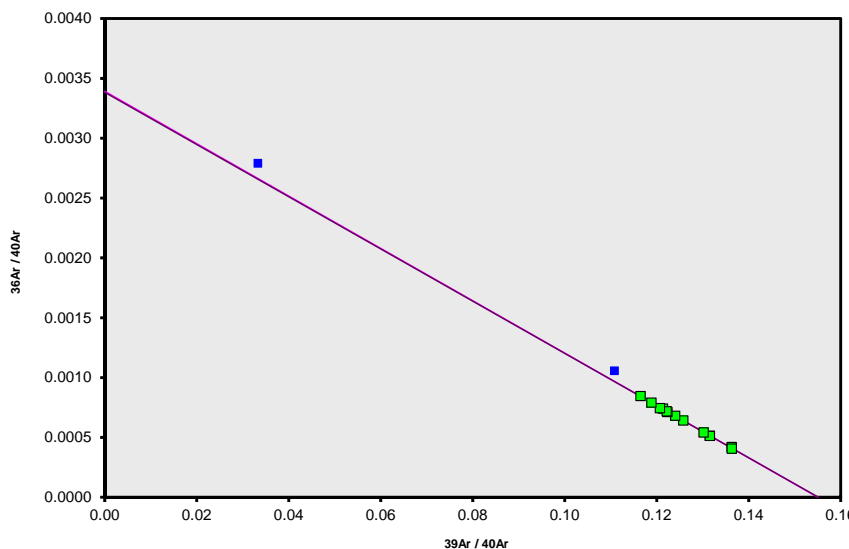

**Ar-Ages in Ma**

WEIGHTED PLATEAU  
 $20.31 \pm 0.12$   
 TOTAL FUSION  
 $20.22 \pm 0.13$   
 NORMAL ISOCHRON  
 $20.32 \pm 0.17$   
 INVERSE ISOCHRON  
 $20.32 \pm 0.17$

MSWD  
 0.29

**Sample Info**

vein feldspar  
 NE Greenland  
 jh

IRR = OSU4D09  
 $J = 0.0017565 \pm 0.0000053$

Sample 239539, sill, Freycinet Bjerg, Geographical Society Ø

13C0105.AGE >>> 239539 PLAG 2B10-12 >>> LARSEN PROJECT

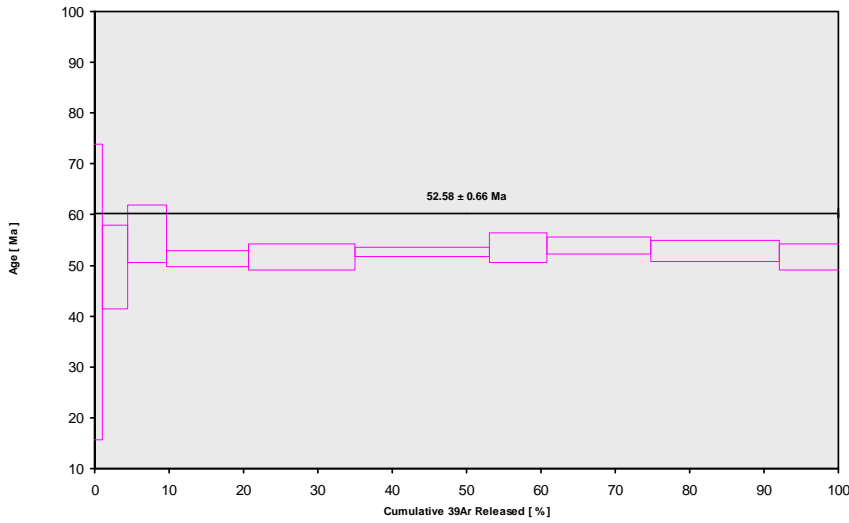

**Ar-Ages in Ma**

WEIGHTED PLATEAU  
52.58 ± 0.66

TOTAL FUSION  
52.56 ± 0.89

NORMAL ISOCHRON  
52.93 ± 1.41

INVERSE ISOCHRON  
52.94 ± 1.43

MSWD (PROBABILITY)  
0.95 (48%)

**Sample Info**

plagioclase  
Greenland  
rd

IRR = OSU2B12

13C0105.AGE >>> 239539 PLAG 2B10-12 >>> LARSEN PROJECT

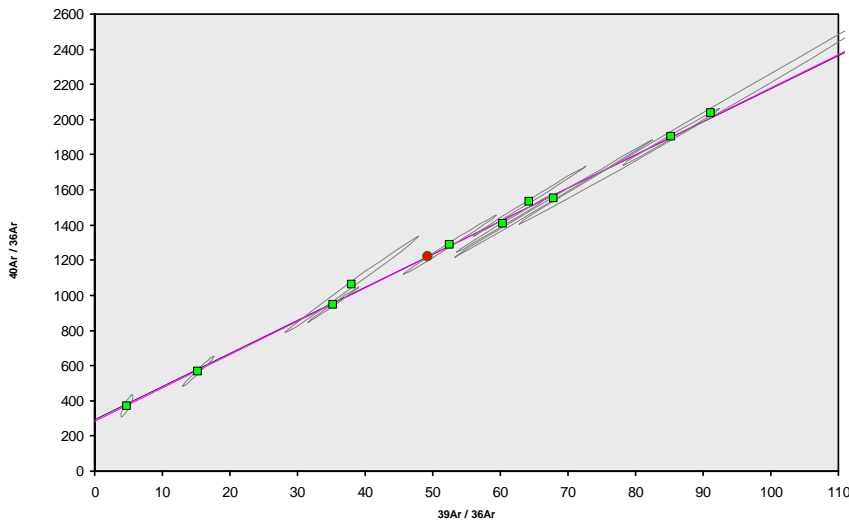

**Ar-Ages in Ma**

WEIGHTED PLATEAU  
52.58 ± 0.66

TOTAL FUSION  
52.56 ± 0.89

NORMAL ISOCHRON  
52.93 ± 1.41

INVERSE ISOCHRON  
52.94 ± 1.43

MSWD (PROBABILITY)  
0.94 (49%)

**Sample Info**

plagioclase  
Greenland  
rd

IRR = OSU2B12

13C0105.AGE >>> 239539 PLAG 2B10-12 >>> LARSEN PROJECT

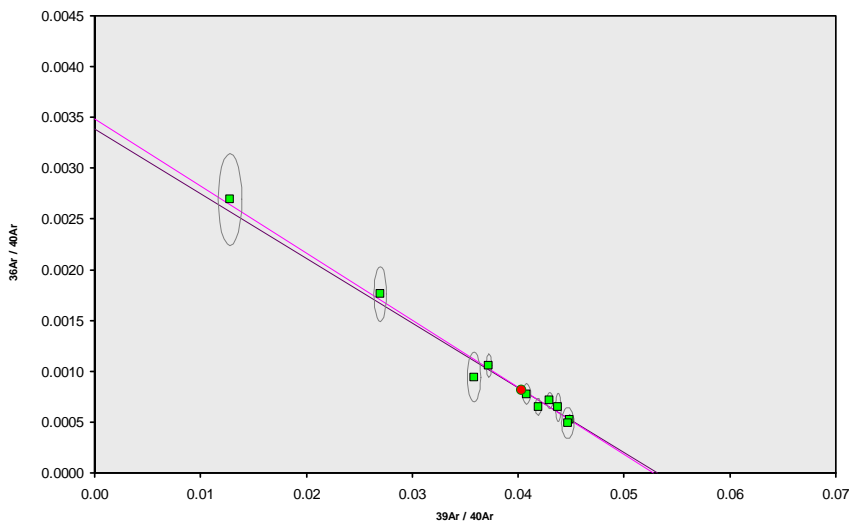

**Ar-Ages in Ma**

WEIGHTED PLATEAU  
52.58 ± 0.66

TOTAL FUSION  
52.56 ± 0.89

NORMAL ISOCHRON  
52.93 ± 1.41

INVERSE ISOCHRON  
52.94 ± 1.43

MSWD (PROBABILITY)  
1.03 (41%)

**Sample Info**

plagioclase  
Greenland  
rd

IRR = OSU2B12

Sample 239578, sill, south coast of Trail Ø

13C0118.AGE >>> 239578 PLAG 2B8-12 >>> LARSEN PROJECT

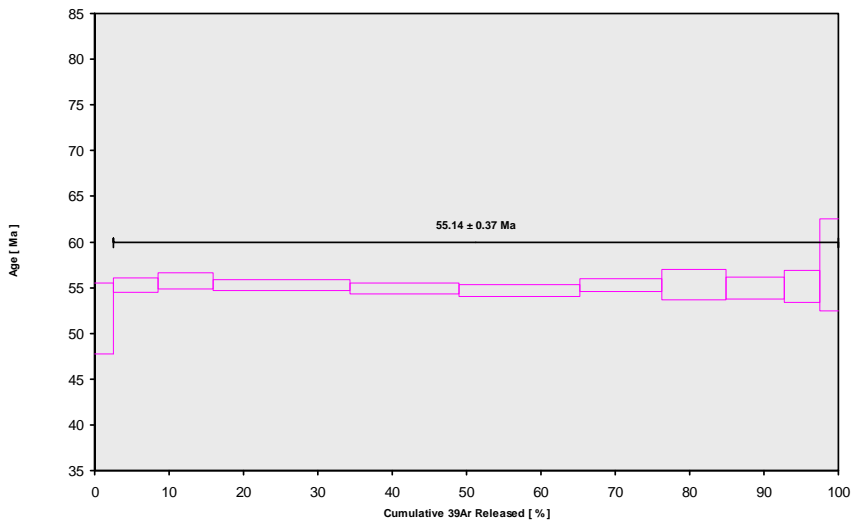

**Ar-Ages in Ma**

WEIGHTED PLATEAU  
55.14 ± 0.37

TOTAL FUSION  
55.11 ± 0.41

NORMAL ISOCHRON  
54.94 ± 0.77

INVERSE ISOCHRON  
54.97 ± 0.77

MSWD (PROBABILITY)  
0.74 (67%)

**Sample Info**

plagioclase  
Greenland  
rd

IRR = OSU2B12

13C0118.AGE >>> 239578 PLAG 2B8-12 >>> LARSEN PROJECT

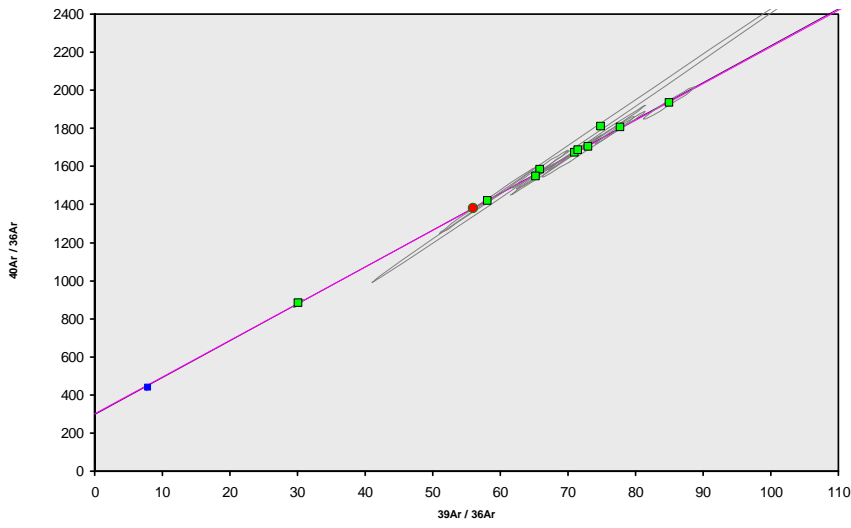

**Ar-Ages in Ma**

WEIGHTED PLATEAU  
55.14 ± 0.37

TOTAL FUSION  
55.11 ± 0.41

NORMAL ISOCHRON  
54.94 ± 0.77

INVERSE ISOCHRON  
54.97 ± 0.77

MSWD (PROBABILITY)  
0.76 (64%)

**Sample Info**

plagioclase  
Greenland  
rd

IRR = OSU2B12

13C0118.AGE >>> 239578 PLAG 2B8-12 >>> LARSEN PROJECT

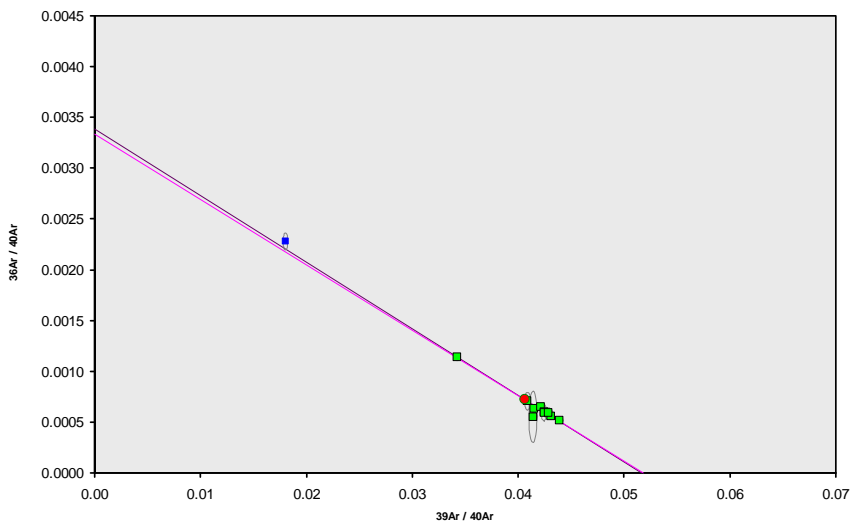

**Ar-Ages in Ma**

WEIGHTED PLATEAU  
55.14 ± 0.37

TOTAL FUSION  
55.11 ± 0.41

NORMAL ISOCHRON  
54.94 ± 0.77

INVERSE ISOCHRON  
54.97 ± 0.77

MSWD (PROBABILITY)  
0.80 (60%)

**Sample Info**

plagioclase  
Greenland  
rd

IRR = OSU2B12



Sample 475289, dyke, Dronning Augusta Dal, Wollaston Forland

09C4212.AGE >>> 475289 >>> LARSEN PROJECT

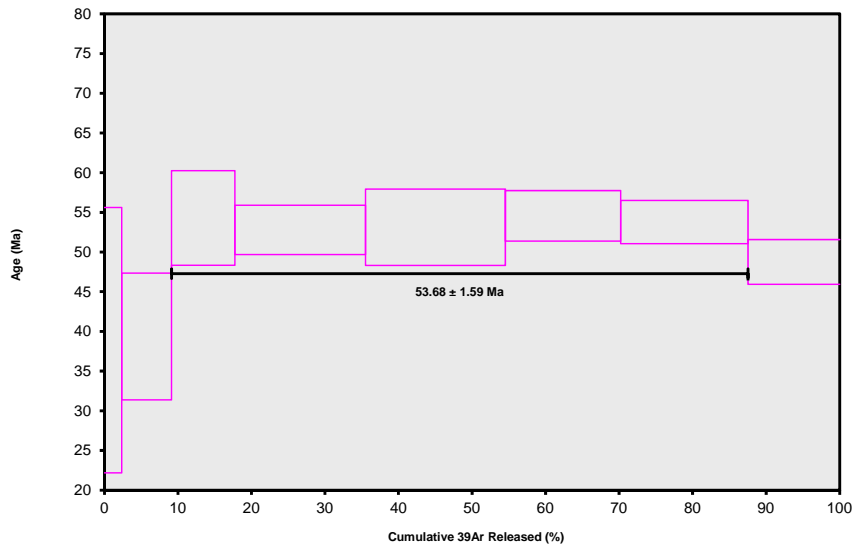

**Ar-Ages in Ma**

WEIGHTED PLATEAU  
 $53.68 \pm 1.59$   
 TOTAL FUSION  
 $51.70 \pm 1.59$   
 NORMAL ISOCHRON  
 $53.48 \pm 6.13$   
 INVERSE ISOCHRON  
 $53.67 \pm 5.78$

MSWD  
 0.19

**Sample Info**

plagioclase  
 NE Greenland  
 jh

IRR = OSU4C09  
 $J = 0.0017722 \pm 0.0000050$

09C4212.AGE >>> 475289 >>> LARSEN PROJECT

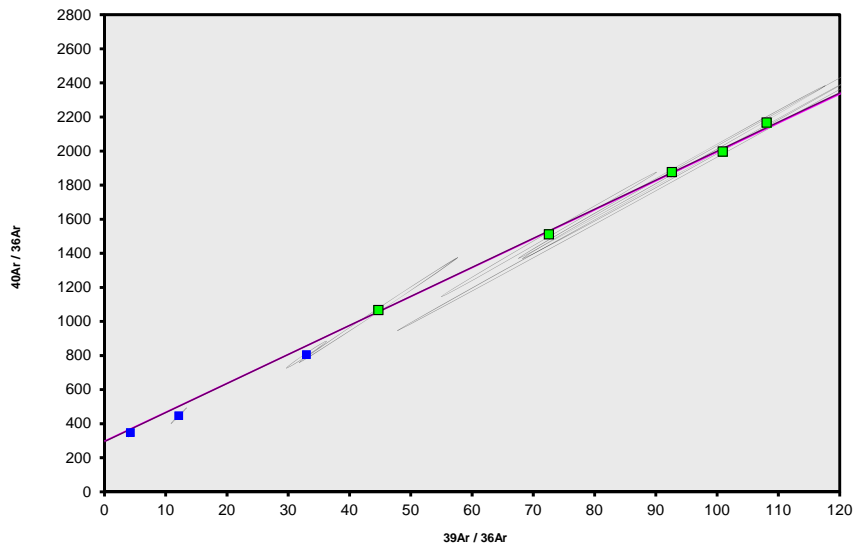

**Ar-Ages in Ma**

WEIGHTED PLATEAU  
 $53.68 \pm 1.59$   
 TOTAL FUSION  
 $51.70 \pm 1.59$   
 NORMAL ISOCHRON  
 $53.48 \pm 6.13$   
 INVERSE ISOCHRON  
 $53.67 \pm 5.78$

MSWD  
 0.24

**Sample Info**

plagioclase  
 NE Greenland  
 jh

IRR = OSU4C09  
 $J = 0.0017722 \pm 0.0000050$

09C4212.AGE >>> 475289 >>> LARSEN PROJECT

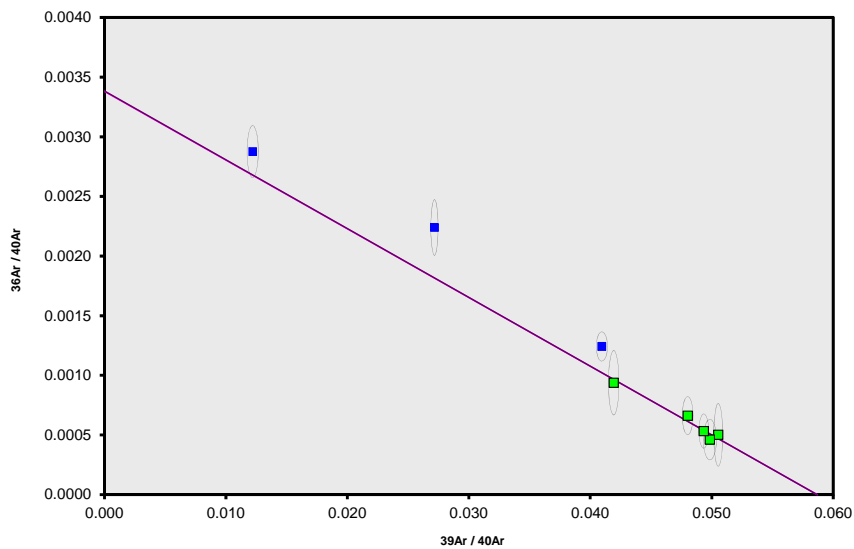

**Ar-Ages in Ma**

WEIGHTED PLATEAU  
 $53.68 \pm 1.59$   
 TOTAL FUSION  
 $51.70 \pm 1.59$   
 NORMAL ISOCHRON  
 $53.48 \pm 6.13$   
 INVERSE ISOCHRON  
 $53.67 \pm 5.78$

MSWD  
 0.25

**Sample Info**

plagioclase  
 NE Greenland  
 jh

IRR = OSU4C09  
 $J = 0.0017722 \pm 0.0000050$

Sample 517310, dyke, Bontekoe Ø

11C158.AGE >>> 517310 >>> LARSEN PROJECT

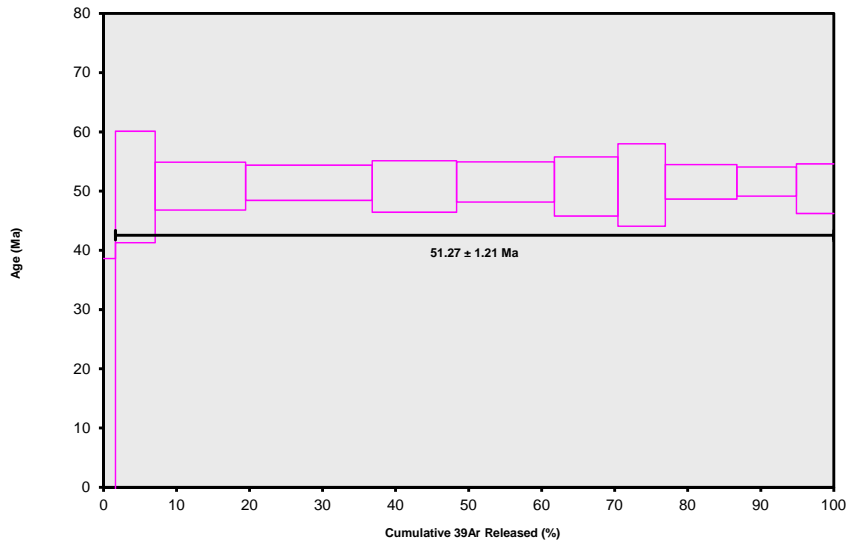

**Ar-Ages in Ma**

WEIGHTED PLATEAU  
51.27 ± 1.21  
TOTAL FUSION  
50.48 ± 1.45  
NORMAL ISOCHRON  
51.39 ± 1.81  
INVERSE ISOCHRON  
51.41 ± 1.81

MSWD  
0.05

**Sample Info**

plagioclase  
E. Greenland  
jh

IRR = OSU3F10  
J = 0.0016770 ± 0.0000049

11C158.AGE >>> 517310 >>> LARSEN PROJECT

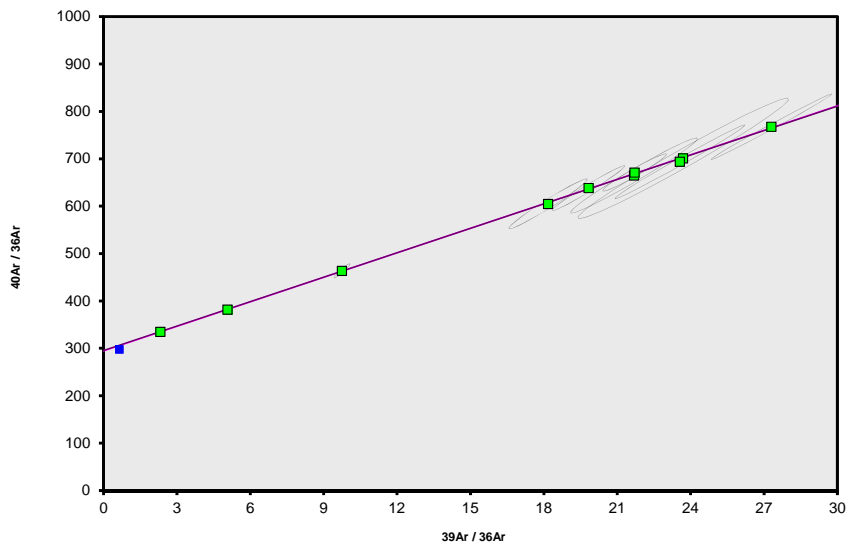

**Ar-Ages in Ma**

WEIGHTED PLATEAU  
51.27 ± 1.21  
TOTAL FUSION  
50.48 ± 1.45  
NORMAL ISOCHRON  
51.39 ± 1.81  
INVERSE ISOCHRON  
51.41 ± 1.81

MSWD  
0.05

**Sample Info**

plagioclase  
E. Greenland  
jh

IRR = OSU3F10  
J = 0.0016770 ± 0.0000049

11C158.AGE >>> 517310 >>> LARSEN PROJECT

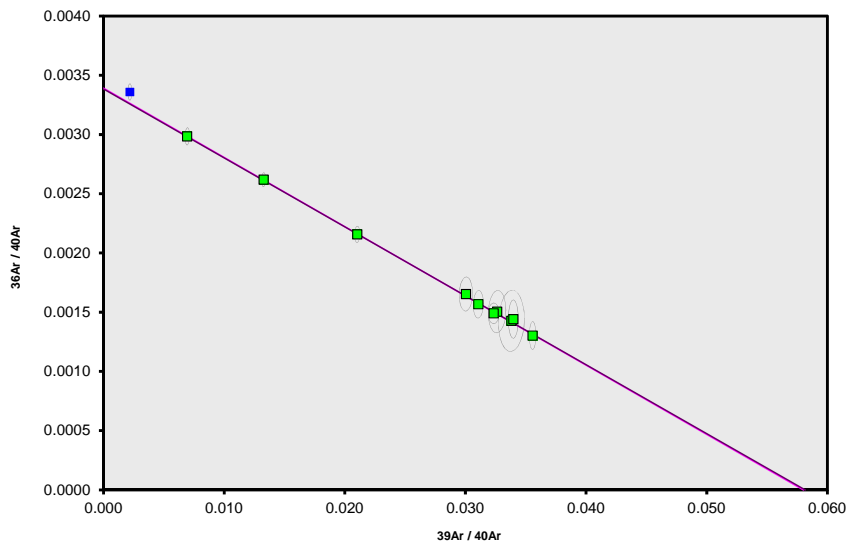

**Ar-Ages in Ma**

WEIGHTED PLATEAU  
51.27 ± 1.21  
TOTAL FUSION  
50.48 ± 1.45  
NORMAL ISOCHRON  
51.39 ± 1.81  
INVERSE ISOCHRON  
51.41 ± 1.81

MSWD  
0.05

**Sample Info**

plagioclase  
E. Greenland  
jh

IRR = OSU3F10  
J = 0.0016770 ± 0.0000049

Sample 228078, Felsite, Kap Broer Ruys, Hold With Hope

11C119.AGE >>> 228078 >>> LARSEN PROJECT

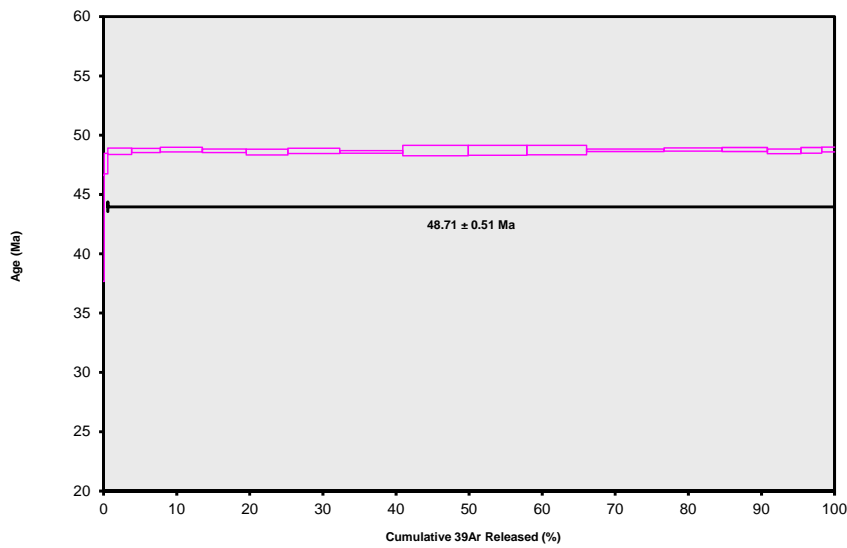

**Ar-Ages in Ma**

WEIGHTED PLATEAU  
48.71 ± 0.51  
TOTAL FUSION  
48.70 ± 0.51  
NORMAL ISOCHRON  
48.65 ± 0.52  
INVERSE ISOCHRON  
48.65 ± 0.52

MSWD  
0.68

**Sample Info**

feldspar  
E. Greenland  
jh

IRR = OSU3F10  
J = 0.0014661 ± 0.0000078

11C119.AGE >>> 228078 >>> LARSEN PROJECT

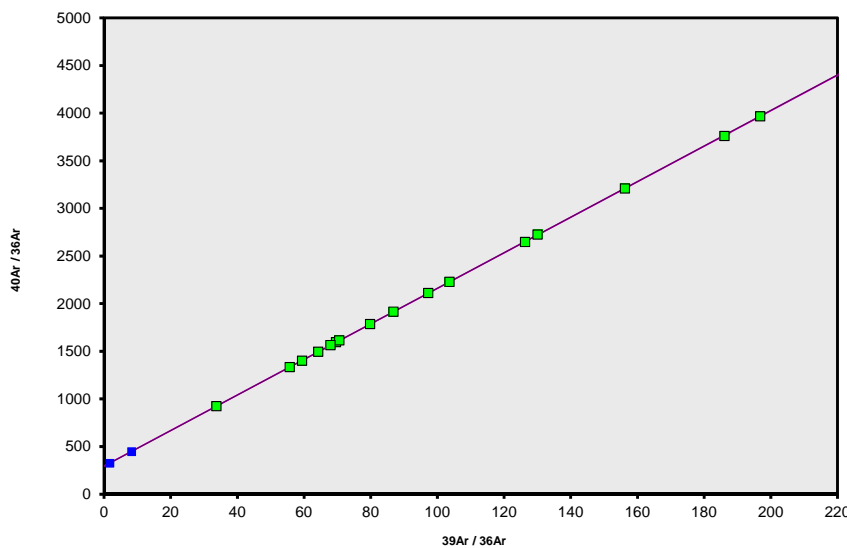

**Ar-Ages in Ma**

WEIGHTED PLATEAU  
48.71 ± 0.51  
TOTAL FUSION  
48.70 ± 0.51  
NORMAL ISOCHRON  
48.65 ± 0.52  
INVERSE ISOCHRON  
48.65 ± 0.52

MSWD  
0.64

**Sample Info**

feldspar  
E. Greenland  
jh

IRR = OSU3F10  
J = 0.0014661 ± 0.0000078

11C119.AGE >>> 228078 >>> LARSEN PROJECT

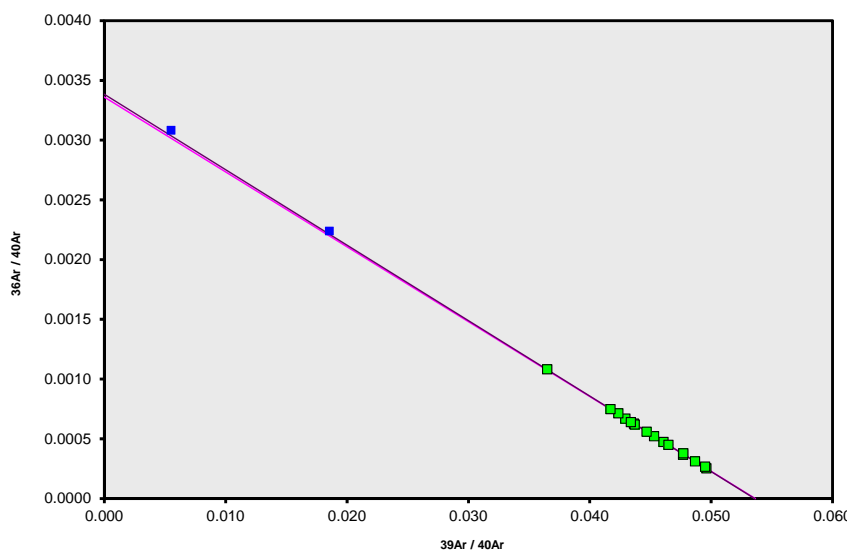

**Ar-Ages in Ma**

WEIGHTED PLATEAU  
48.71 ± 0.51  
TOTAL FUSION  
48.70 ± 0.51  
NORMAL ISOCHRON  
48.65 ± 0.52  
INVERSE ISOCHRON  
48.65 ± 0.52

MSWD  
0.64

**Sample Info**

feldspar  
E. Greenland  
jh

IRR = OSU3F10  
J = 0.0014661 ± 0.0000078
